# Supplementary material for: Outcomes of CAR-T Cell Therapy Recipients Admitted to the ICU: In Search for a Standard of Care—A Brief Overview and Meta-Analysis of Proportions
Source: MDPI journal article supplement (doi:10.3390/jcm12186098), 2023-09-21
Supplement: s1 [file s1]

## Supplemental document

### Table of Contents

|                                                                    |           |
|--------------------------------------------------------------------|-----------|
| <b>Statistics.....</b>                                             | <b>3</b>  |
| <b>1. ICU Admission – Male sex .....</b>                           | <b>3</b>  |
| Test for heterogeneity .....                                       | 4         |
| Publication bias .....                                             | 4         |
| <b>2. ICU admitted.....</b>                                        | <b>4</b>  |
| Test for heterogeneity .....                                       | 5         |
| Publication bias .....                                             | 5         |
| <b>3. ICU mortality .....</b>                                      | <b>6</b>  |
| Test for heterogeneity .....                                       | 6         |
| Publication bias .....                                             | 6         |
| <b>4. Hospital mortality.....</b>                                  | <b>6</b>  |
| Test for heterogeneity .....                                       | 7         |
| Publication bias .....                                             | 7         |
| <b>5. Reasons for ICU admission – hypotension .....</b>            | <b>7</b>  |
| Test for heterogeneity .....                                       | 8         |
| Publication bias .....                                             | 8         |
| <b>6. Reasons for ICU admission – acute kidney injury.....</b>     | <b>8</b>  |
| Test for heterogeneity .....                                       | 9         |
| Publication bias .....                                             | 9         |
| <b>7. Reasons ICU admission – acute respiratory failure .....</b>  | <b>9</b>  |
| Test for heterogeneity .....                                       | 10        |
| Publication bias .....                                             | 10        |
| <b>8. Reasons for ICU admission – altered mental status.....</b>   | <b>10</b> |
| Test for heterogeneity .....                                       | 11        |
| Publication bias .....                                             | 11        |
| <b>9. Number of chemotherapy lines before CAR-T infusion .....</b> | <b>11</b> |
| <b>10. Isolated CRS .....</b>                                      | <b>12</b> |
| Test for heterogeneity .....                                       | 12        |
| Publication bias .....                                             | 13        |

|                                                                            |           |
|----------------------------------------------------------------------------|-----------|
| <b>11. Isolated ICANS.....</b>                                             | <b>13</b> |
| Test for heterogeneity .....                                               | 13        |
| Publication bias .....                                                     | 13        |
| <b>12. CRS and ICANS.....</b>                                              | <b>14</b> |
| Test for heterogeneity .....                                               | 14        |
| Publication bias .....                                                     | 14        |
| <b>13. CRS presentation - fever .....</b>                                  | <b>15</b> |
| Test for heterogeneity .....                                               | 15        |
| Publication bias .....                                                     | 15        |
| <b>14. CRS presentation - hypotension.....</b>                             | <b>15</b> |
| Test for heterogeneity .....                                               | 16        |
| Publication bias .....                                                     | 16        |
| <b>15. CRS presentation – arrhythmias .....</b>                            | <b>16</b> |
| Test for heterogeneity .....                                               | 17        |
| Publication bias .....                                                     | 17        |
| <b>16. CRS presentation – acute kidney injury.....</b>                     | <b>17</b> |
| Test for heterogeneity .....                                               | 18        |
| Publication bias .....                                                     | 18        |
| <b>17. CRS developed during ICU stay.....</b>                              | <b>18</b> |
| Test for heterogeneity .....                                               | 19        |
| Publication bias .....                                                     | 19        |
| <b>18. ICANS developed during ICU stay .....</b>                           | <b>20</b> |
| Test for heterogeneity .....                                               | 20        |
| Publication bias .....                                                     | 20        |
| <b>19. High-flow nasal oxygen, non-invasive ventilation required .....</b> | <b>21</b> |
| Test for heterogeneity .....                                               | 21        |
| Publication bias .....                                                     | 21        |
| <b>20. Vasoactive drugs.....</b>                                           | <b>21</b> |
| Test for heterogeneity .....                                               | 22        |
| Publication bias .....                                                     | 22        |
| <b>21. Renal replacement therapy .....</b>                                 | <b>22</b> |
| Test for heterogeneity .....                                               | 23        |
| Publication bias .....                                                     | 23        |
| <b>22. Mechanical ventilation during ICU stay.....</b>                     | <b>23</b> |

|                                                                 |           |
|-----------------------------------------------------------------|-----------|
| Test for heterogeneity .....                                    | 24        |
| Publication bias .....                                          | 24        |
| <b>23.    <i>Readmission to the ICU within 30 days</i>.....</b> | <b>25</b> |
| Test for heterogeneity .....                                    | 25        |
| Publication bias .....                                          | 25        |
| <b>24.    <i>Malignancy</i> .....</b>                           | <b>26</b> |
| Test for heterogeneity .....                                    | 26        |
| Publication bias .....                                          | 26        |

## Statistics

### 1. ICU Admission – Male sex

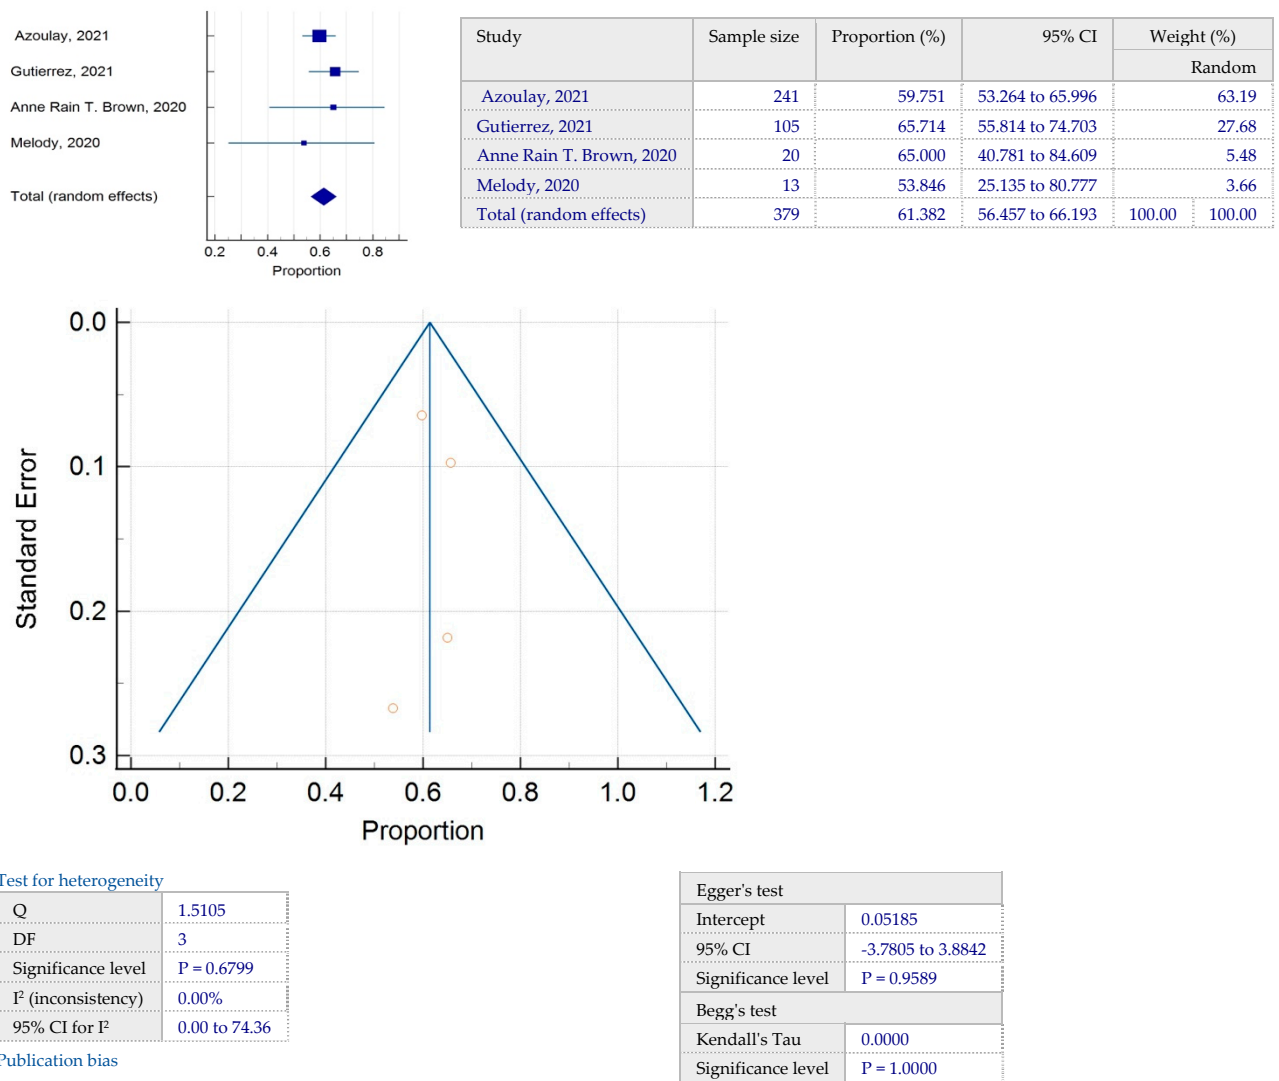

**Figure 1.** Forest plot of proportions of male patients admitted in the ICU, in published studies.

**Figure 1** shows the combined proportion for our outcome of interest – the males admitted to the ICU as a percentage. On average, 61% CI 95%[56-66] of the recipients of CAR-T cells who were admitted to the ICU were males.

## 2. ICU admitted

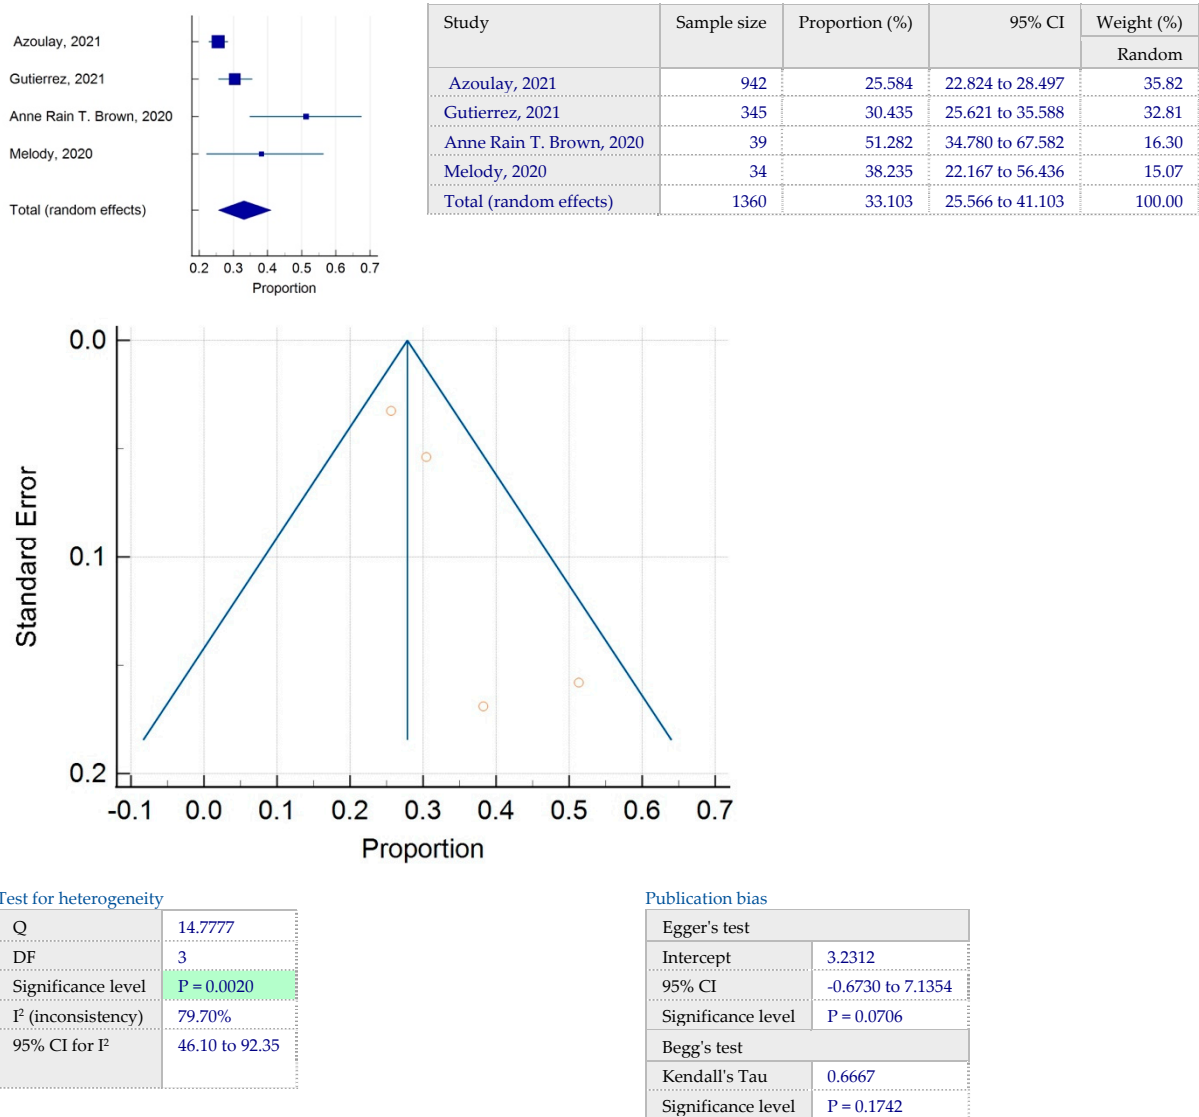

**Figure 2.** Forest plot of proportions of ICU admitted patients, in published studies.

**Figure 2** shows the combined proportion for our outcome of interest – patients admitted to the ICU from total CAR-T recipients, as a percentage. On average, 33% CI-95% [26-41] of the recipients of CAR-T cells were admitted to the ICU. A substantial level of heterogeneity (80%) was reported.

### 3. ICU mortality

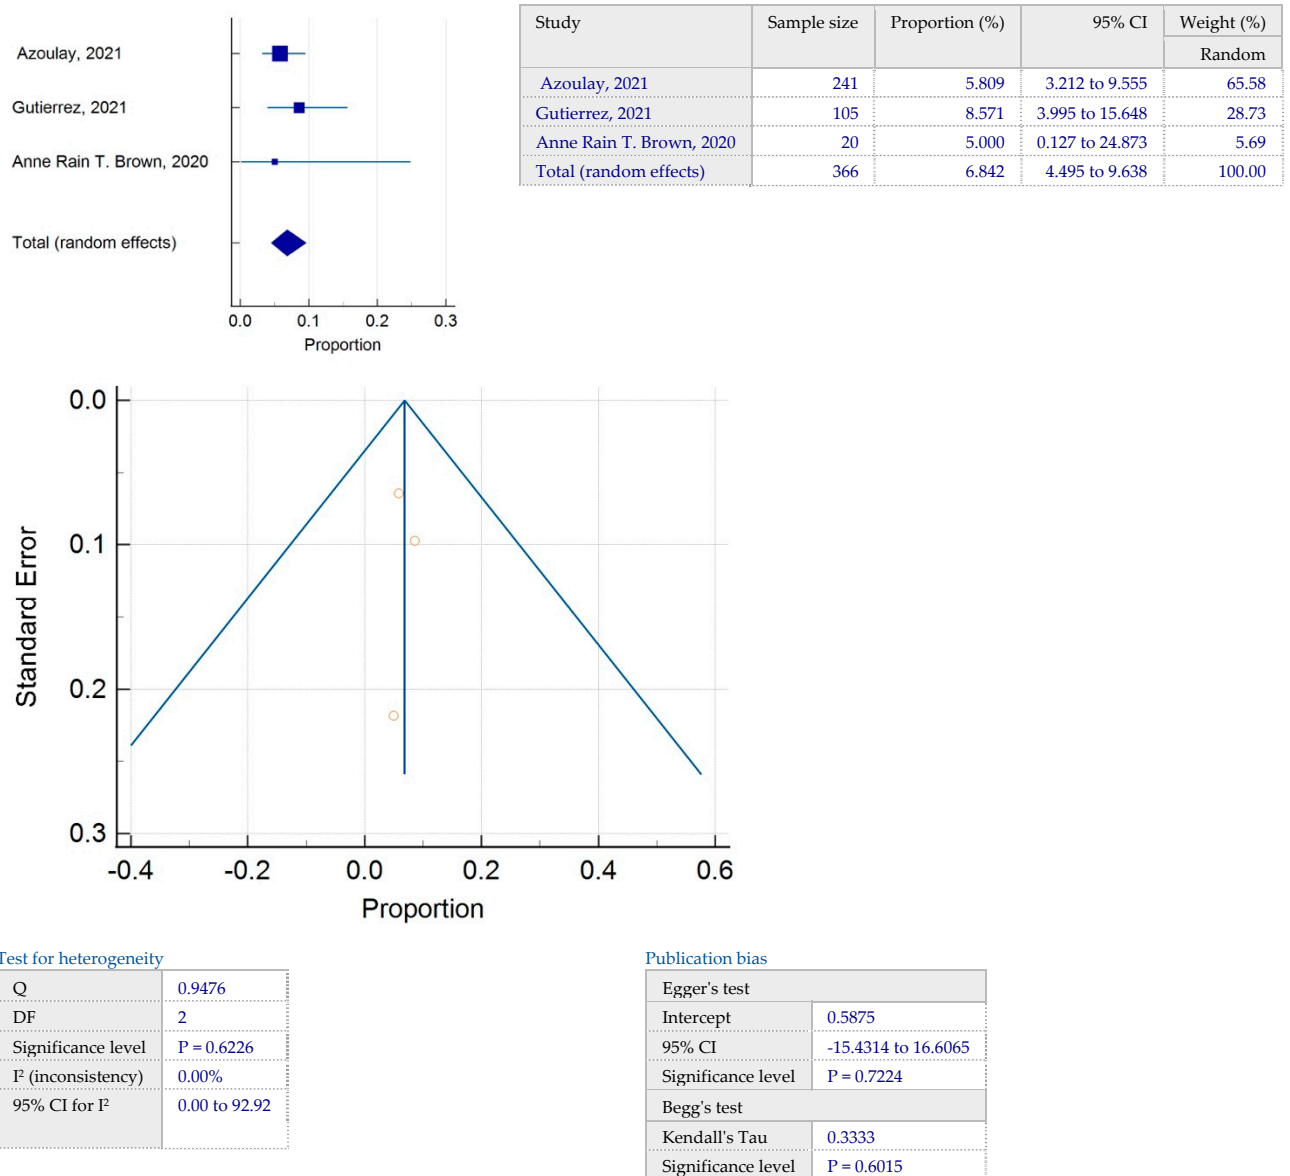

**Figure 3.** Forest plot of proportions of ICU admitted patients who died, in published studies.

**Figure 3** shows the combined proportion for our outcome of interest – patients admitted to the ICU who died from total CAR-T recipients admitted in the ICU, as a percentage. On average, 7% CI-95% [5-10] of the recipients of CAR-T therapy who were admitted to the ICU died. A 0% level of heterogeneity was reported with a  $p > 0.10$ .

### 4. Hospital mortality

| Study | Sample size | Proportion (%) | 95% CI | Weight (%) |
|-------|-------------|----------------|--------|------------|
|-------|-------------|----------------|--------|------------|

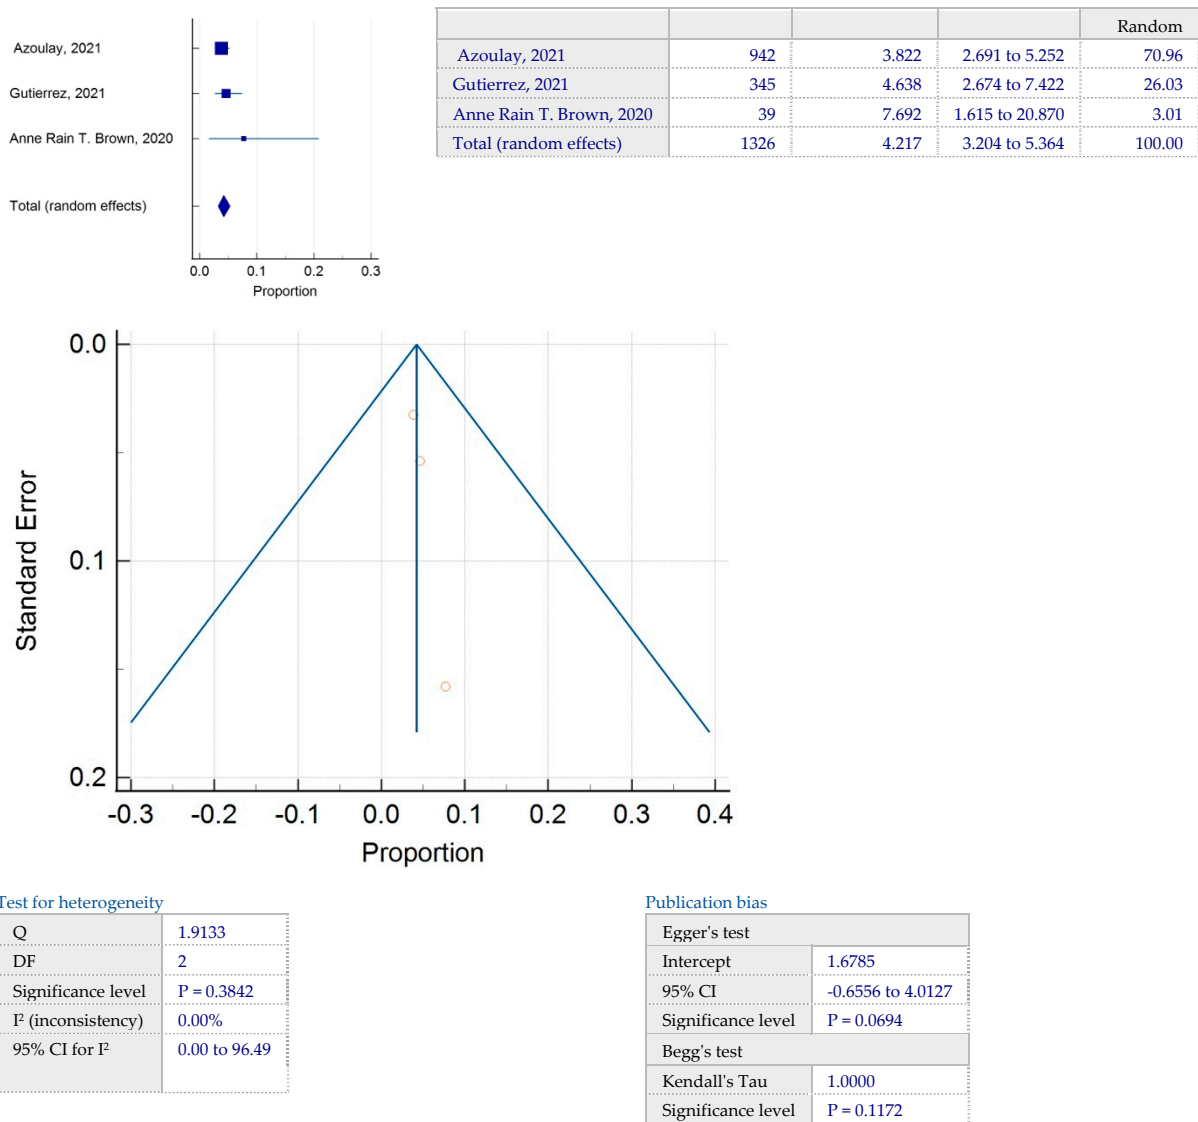

**Figure 4.** Forest plot of proportions of CAR-T recipients who died in the hospital, in published studies.

**Figure 4** shows the combined proportion for our outcome of interest – CAR-T recipients patients who died in the hospital, as a percentage. On average, 4% CI-95% [3-5] of the CAR-T recipients died in the hospital. A 0% level of heterogeneity was reported with a  $p > 0.10$ .

## 5. Reasons for ICU admission – hypotension

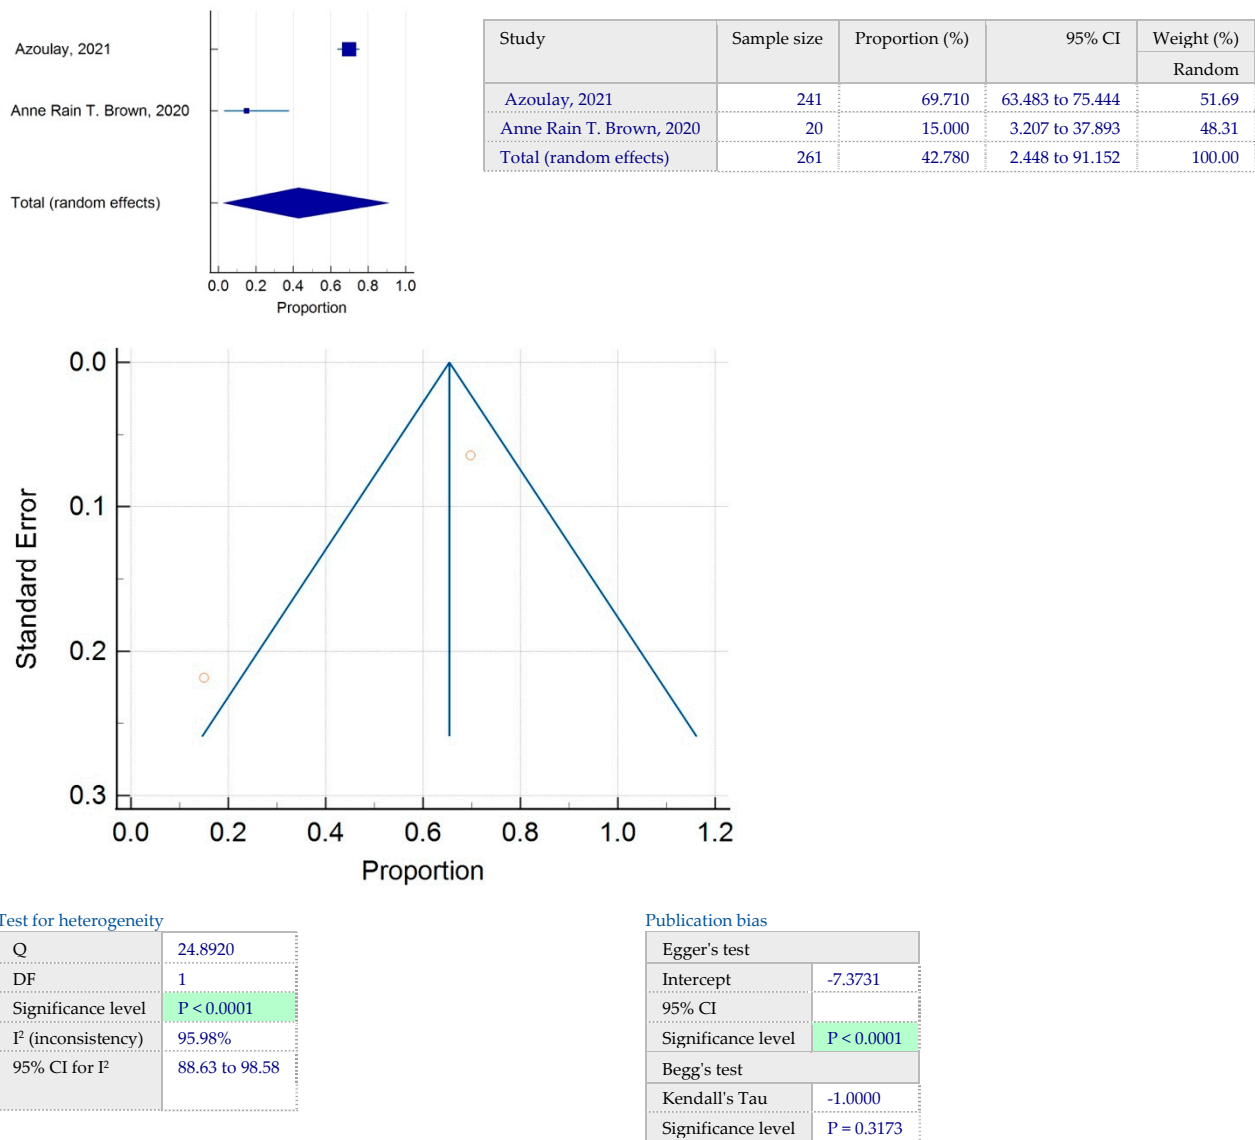

**Figure 5.** Forest plot of proportions of CAR-T recipients in which the main reason for admission to the ICU was hypotension, in published studies.

**Figure 5** shows the combined proportion for our outcome of interest – hypotension as the main reason for admission to the ICU, as a percentage. On average, 42% CI-95% [3-91] of the CAR-T recipients were admitted to the ICU because of hypotension. A considerable level of heterogeneity was reported (96%).

## 6. Reasons for ICU admission – acute kidney injury



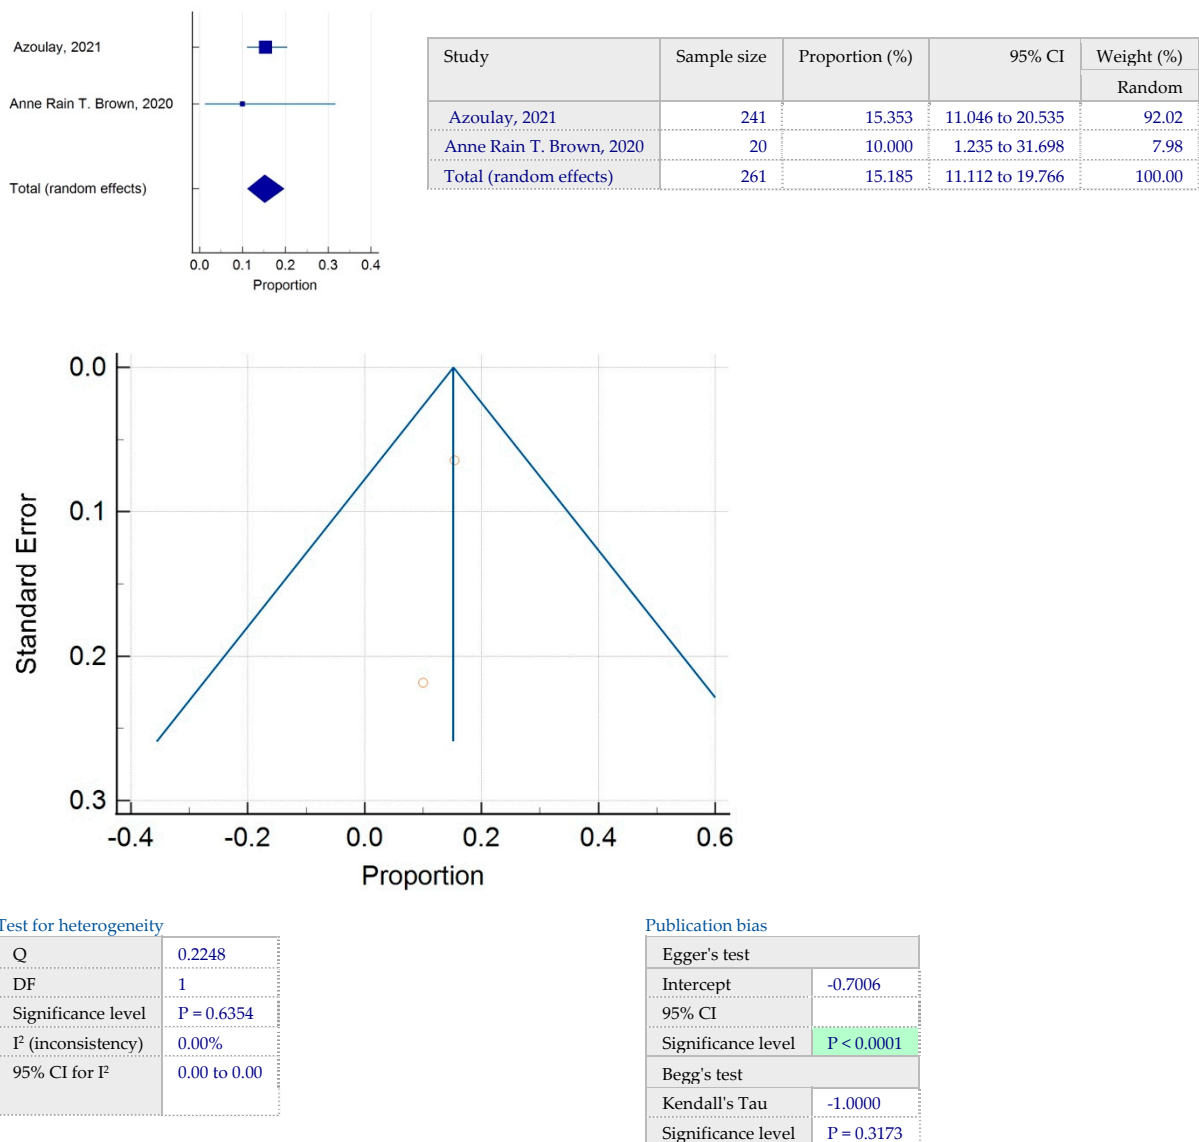

**Figure 6.** Forest plot of proportions of CAR-T recipients in which the main reason for admission to the ICU was acute kidney injury (AKI), in published studies.

**Figure 6** shows the combined proportion for our outcome of interest – AKI as the main reason for admission to the ICU, as a percentage. On average, 15% CI-95% [11-19] of the CAR-T recipients were admitted to the ICU because of AKI. A 0% level of heterogeneity was reported with a  $p > 0.10$ .

## 7. Reasons ICU admission – acute respiratory failure

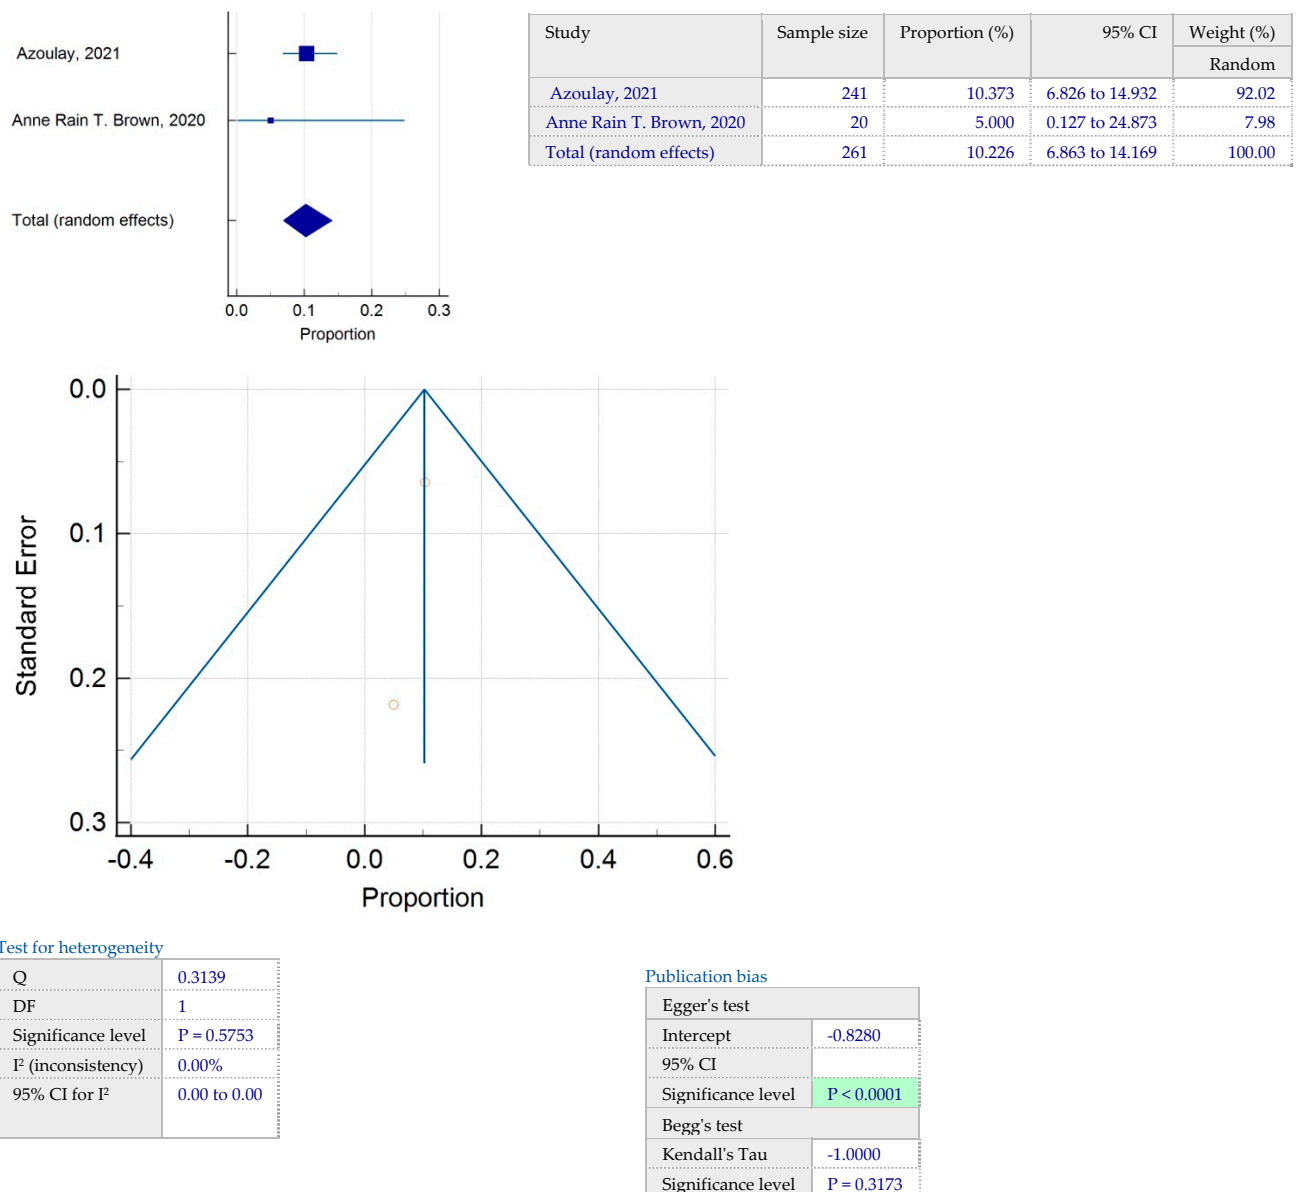

**Figure 7.** Forest plot of proportions of CAR-T recipients in which the main reason for admission to the ICU was acute respiratory failure, in published studies.

**Figure 7** shows the combined proportion for our outcome of interest – acute respiratory failure as the main reason for admission to the ICU, as a percentage. On average, 10% CI-95% [7-14] of the CAR-T recipients were admitted to the ICU because of acute respiratory failure. A 0% level of heterogeneity was reported with a  $p > 0.10$ .

## 8. Reasons for ICU admission – altered mental status

| Study | Sample size | Proportion (%) | 95% CI | Weight (%) |
|-------|-------------|----------------|--------|------------|
|-------|-------------|----------------|--------|------------|

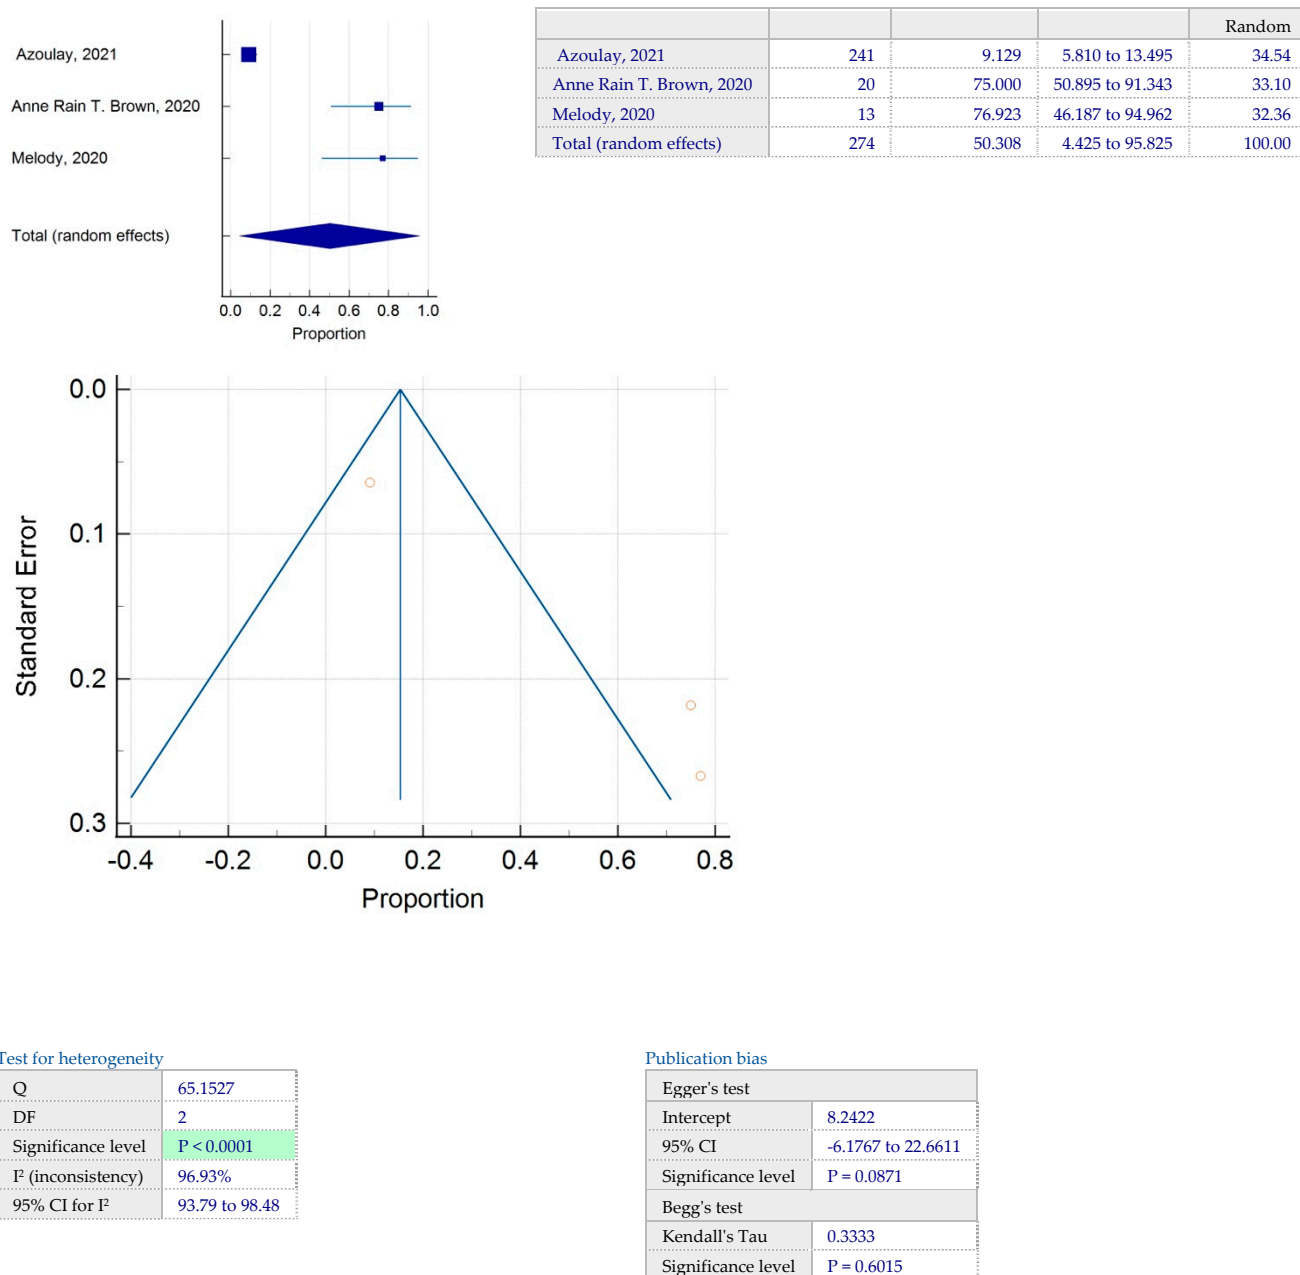

**Figure 8.** Forest plot of proportions of CAR-T recipients in which the main reason for admission to the ICU was altered mental status, in published studies.

**Figure 8** shows the combined proportion for our outcome of interest – altered mental status as the main reason for admission to the ICU, as a percentage. On average, 50% CI-95% [4-95] of the CAR-T recipients were admitted to the ICU because of altered mental status. A considerable level of heterogeneity was reported (96%).

## 9. Number of chemotherapy lines before CAR-T infusion

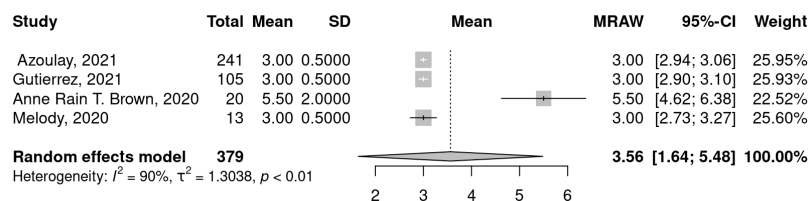

**Figure 9.** Forest plot of proportions of the number of chemotherapy lines patients received before CAR-T infusion, in published studies.

**Figure 9** shows the combined proportion for our outcome of interest – the number of chemotherapy lines patients received before CAR-T infusion, as a crude mean. On average, the number of chemotherapy lines patients received before CAR-T infusion was 3,56, CI-95% [1,64; 5,48]. A considerable level of heterogeneity was reported (90%).

## 10. Isolated CRS

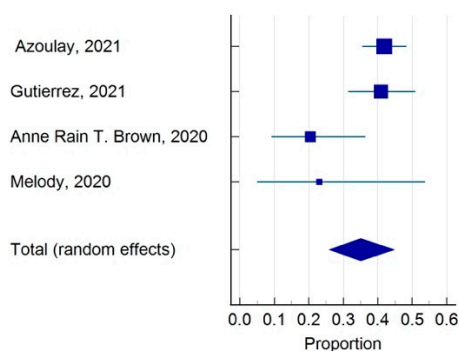

| Study                    | Sample size | Proportion (%) | 95% CI           | Weight (%) |
|--------------------------|-------------|----------------|------------------|------------|
| Azoulay, 2021            | 241         | 41.909         | 35.606 to 48.413 | 36.79      |
| Gutierrez, 2021          | 105         | 40.952         | 31.451 to 50.978 | 31.02      |
| Anne Rain T. Brown, 2020 | 39          | 20.513         | 9.296 to 36.464  | 21.24      |
| Melody, 2020             | 13          | 23.077         | 5.038 to 53.813  | 10.95      |
| Total (random effects)   | 398         | 35.071         | 25.854 to 44.887 | 100.00     |

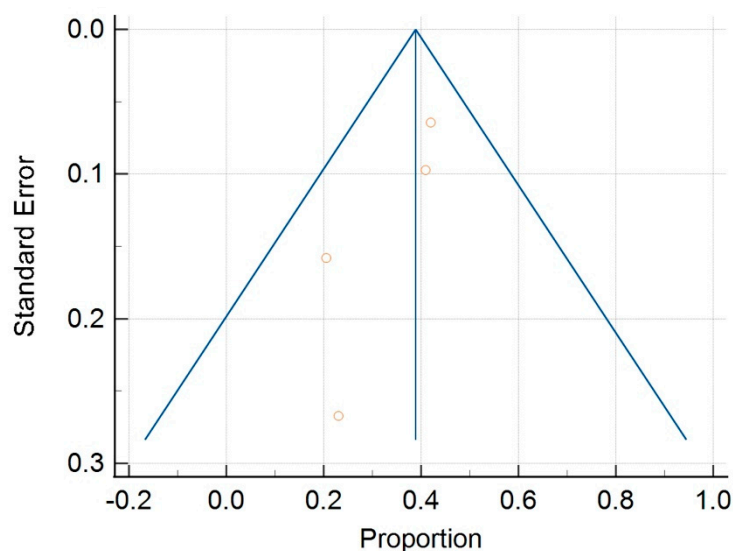

Test for heterogeneity

|   |        |
|---|--------|
| Q | 8.4614 |
|---|--------|

|                    |            |
|--------------------|------------|
| DF                 | 3          |
| Significance level | P = 0.0374 |

|                                |               |
|--------------------------------|---------------|
| I <sup>2</sup> (inconsistency) | 64.55%        |
| 95% CI for I <sup>2</sup>      | 0.00 to 87.99 |

#### Publication bias

|              |  |
|--------------|--|
| Egger's test |  |
|--------------|--|

|                    |                   |
|--------------------|-------------------|
| Intercept          | -2.7338           |
| 95% CI             | -8.1989 to 2.7313 |
| Significance level | P = 0.1643        |
| Begg's test        |                   |
| Kendall's Tau      | -0.6667           |
| Significance level | P = 0.1742        |

**Figure 10.** Forest plot of proportions of CAR-T recipients who were admitted to the ICU with isolated CRS, in published studies.

**Figure 10** shows the combined proportion for our outcome of interest – isolated CRS at admission to the ICU, as a percentage. On average, 35% CI-95% [26-45] of the CAR-T recipients were admitted to the ICU with isolated CRS. A substantial level of heterogeneity was reported (65%).

## 11. Isolated ICANS

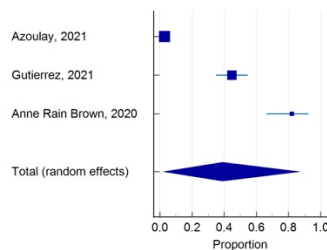

| Study                  | Sample size | Proportion (%) | 95% CI           | Weight (%) |
|------------------------|-------------|----------------|------------------|------------|
|                        |             |                |                  | Random     |
| Azoulay, 2021          | 241         | 2.905          | 1.176 to 5.893   | 33.67      |
| Gutierrez, 2021        | 105         | 44.762         | 35.047 to 54.780 | 33.46      |
| Anne Rain Brown, 2020  | 39          | 82.051         | 66.465 to 92.465 | 32.87      |
| Total (random effects) | 385         | 38.970         | 2.084 to 87.105  | 100.00     |

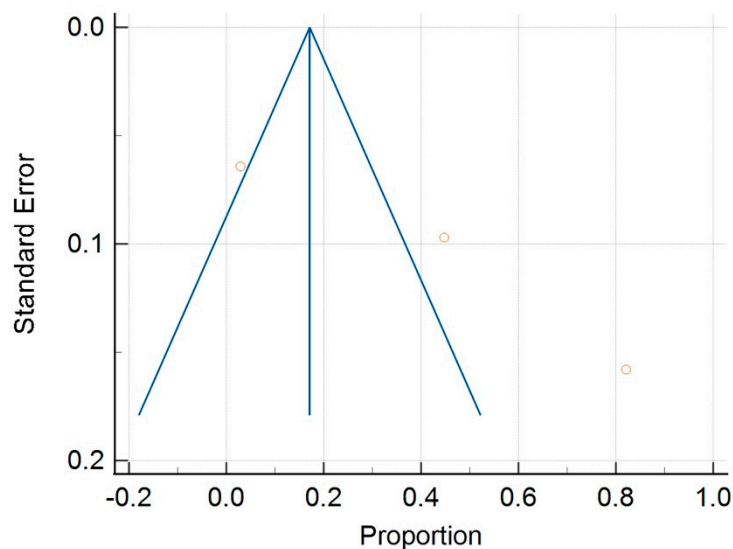

#### Test for heterogeneity

|                                |                |
|--------------------------------|----------------|
| Q                              | 177.9161       |
| DF                             | 2              |
| Significance level             | P < 0.0001     |
| I <sup>2</sup> (inconsistency) | 98.88%         |
| 95% CI for I <sup>2</sup>      | 98.12 to 99.33 |

#### Publication bias

|                    |                      |
|--------------------|----------------------|
| Egger's test       |                      |
| Intercept          | 22.2152              |
| 95% CI             | -61.0877 to 105.5181 |
| Significance level | P = 0.1827           |
| Begg's test        |                      |
| Kendall's Tau      | 1.0000               |
| Significance level | P = 0.1172           |

**Figure 11.** Forest plot of proportions of CAR-T recipients who were admitted to the ICU with isolated ICANS, in published studies.

**Figure 11** shows the combined proportion for our outcome of interest – isolated ICANS at admission to the ICU, as a percentage. On average, 39% CI-95% [2-87] of the CAR-T recipients were admitted to the ICU with isolated ICANS. A considerable level of heterogeneity was reported (99%).

## 12.CRS and ICANS

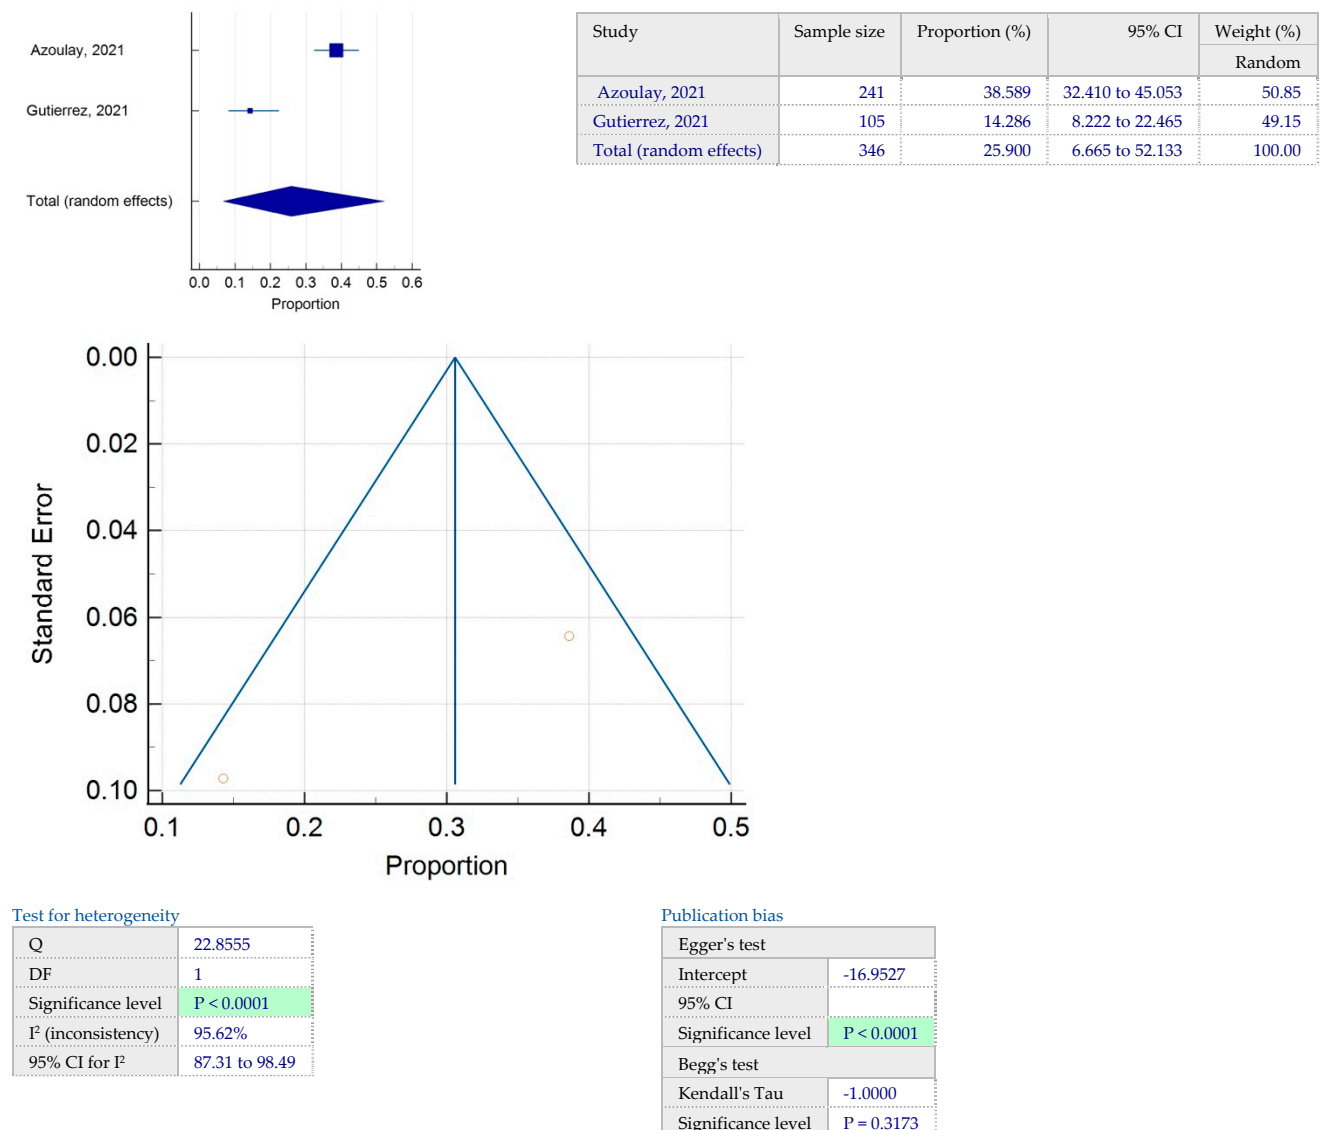

**Figure 12.** Forest plot of proportions of CAR-T recipients who were admitted to the ICU with CRS and ICANS, in published studies.

**Figure 12** shows the combined proportion for our outcome of interest – CRS and ICANS at admission to the ICU, as a percentage. On average, 26% CI-95% [7-52] of the CAR-T recipients were admitted to the ICU with CRS and ICANS. A considerable level of heterogeneity was reported (95%).

### 13.CRS presentation - fever

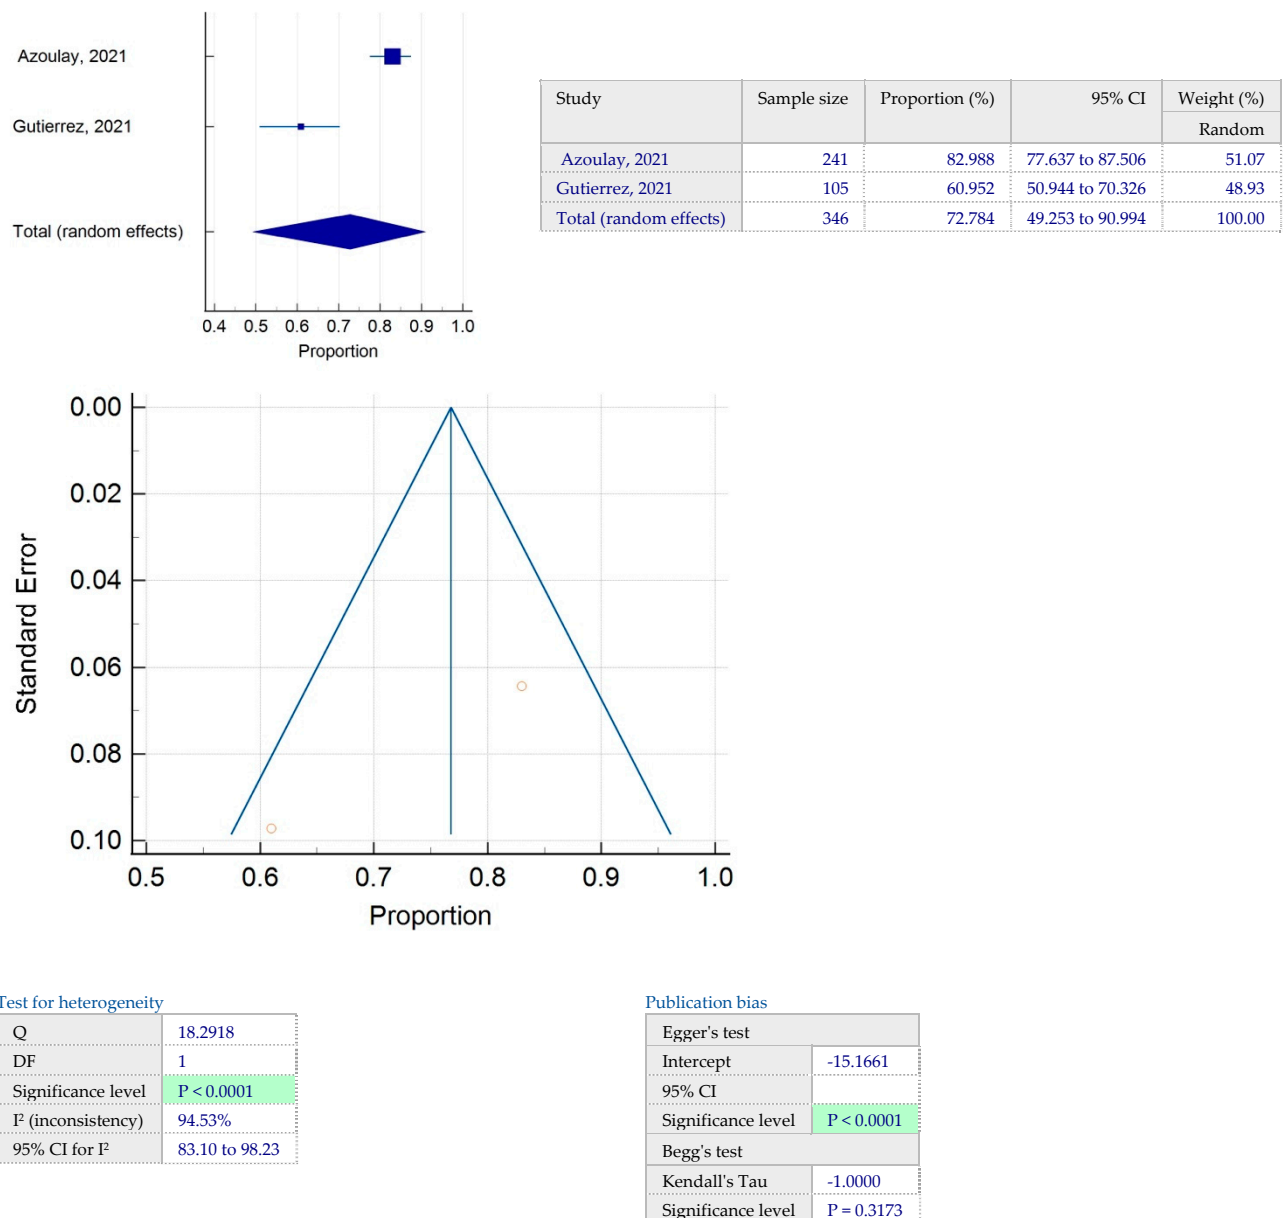

**Figure 13.** Forest plot of proportions of CAR-T recipients who were admitted to the ICU with fever as the main symptom of CRS, in published studies.

**Figure 13** shows the combined proportion for our outcome of interest – fever as the main symptom of CRS at admission to the ICU, as a percentage. On average, 72% CI-95% [49-91] of the CAR-T recipients were admitted to the ICU with fever as the main symptom of CRS. A considerable level of heterogeneity was reported (95%).

### 14. CRS presentation - hypotension

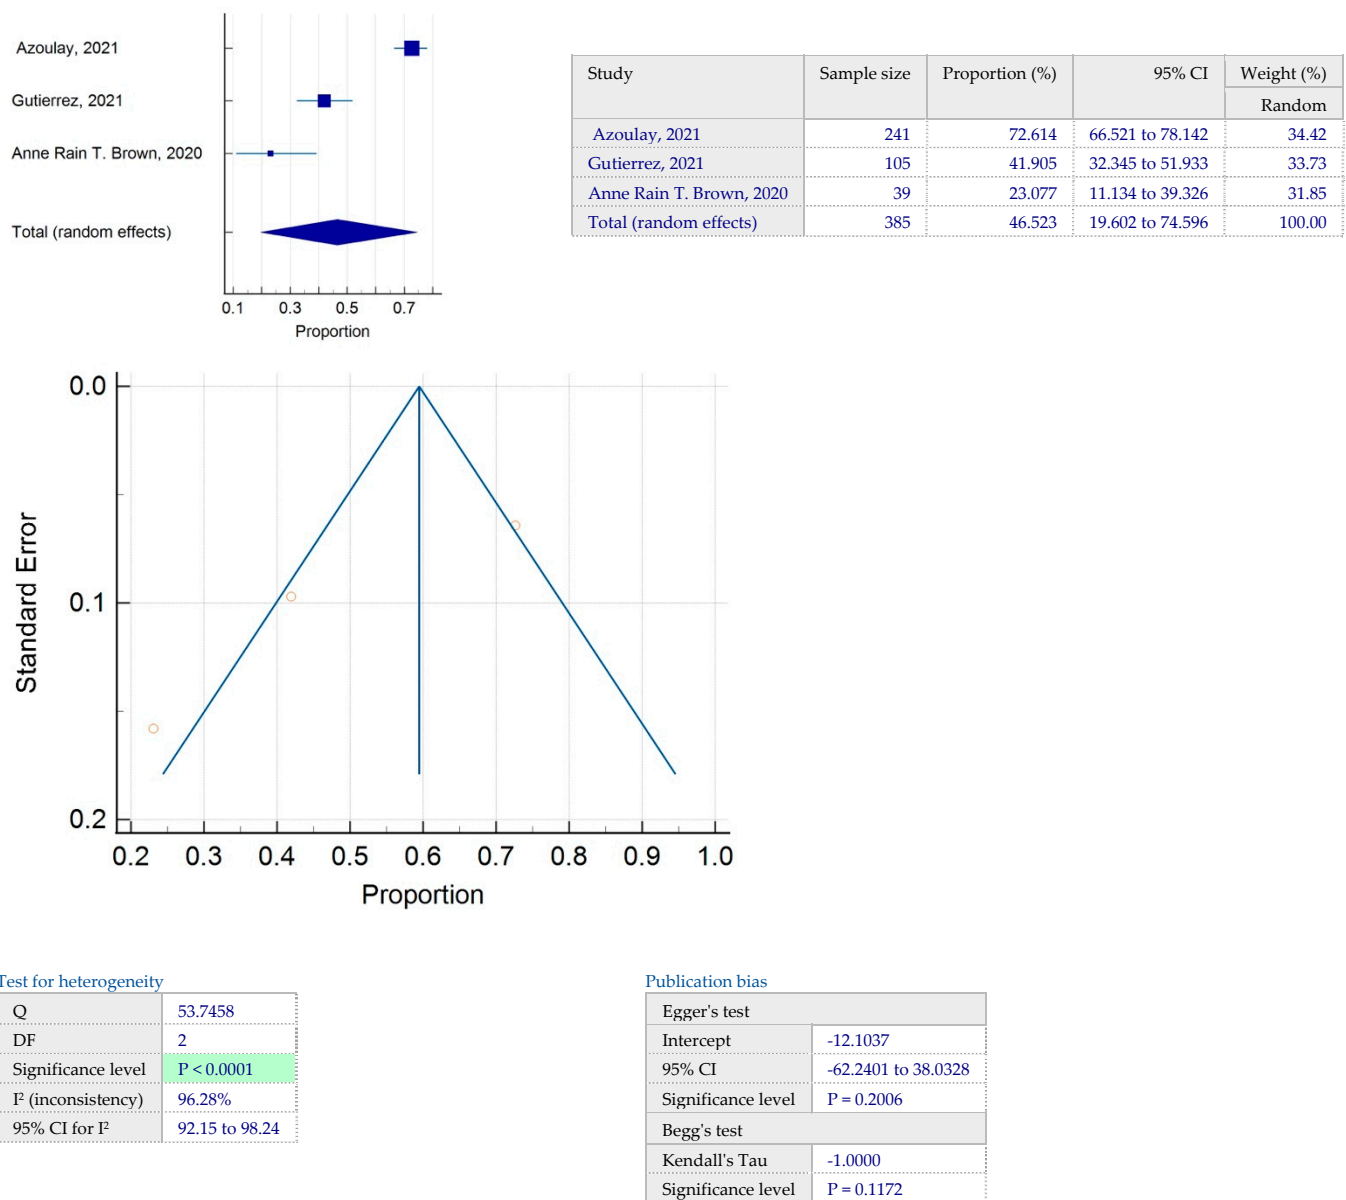

**Figure 14.** Forest plot of proportions of CAR-T recipients who were admitted to the ICU with hypotension as the main symptom of CRS, in published studies.

**Figure 14** shows the combined proportion for our outcome of interest – hypotension as the main symptom of CRS at admission to the ICU, as a percentage. On average, 46% CI-95% [20-75] of the CAR-T recipients were admitted to the ICU with hypotension as the main symptom of CRS. A considerable level of heterogeneity was reported (96%).

## 15.CRS presentation – arrhythmias



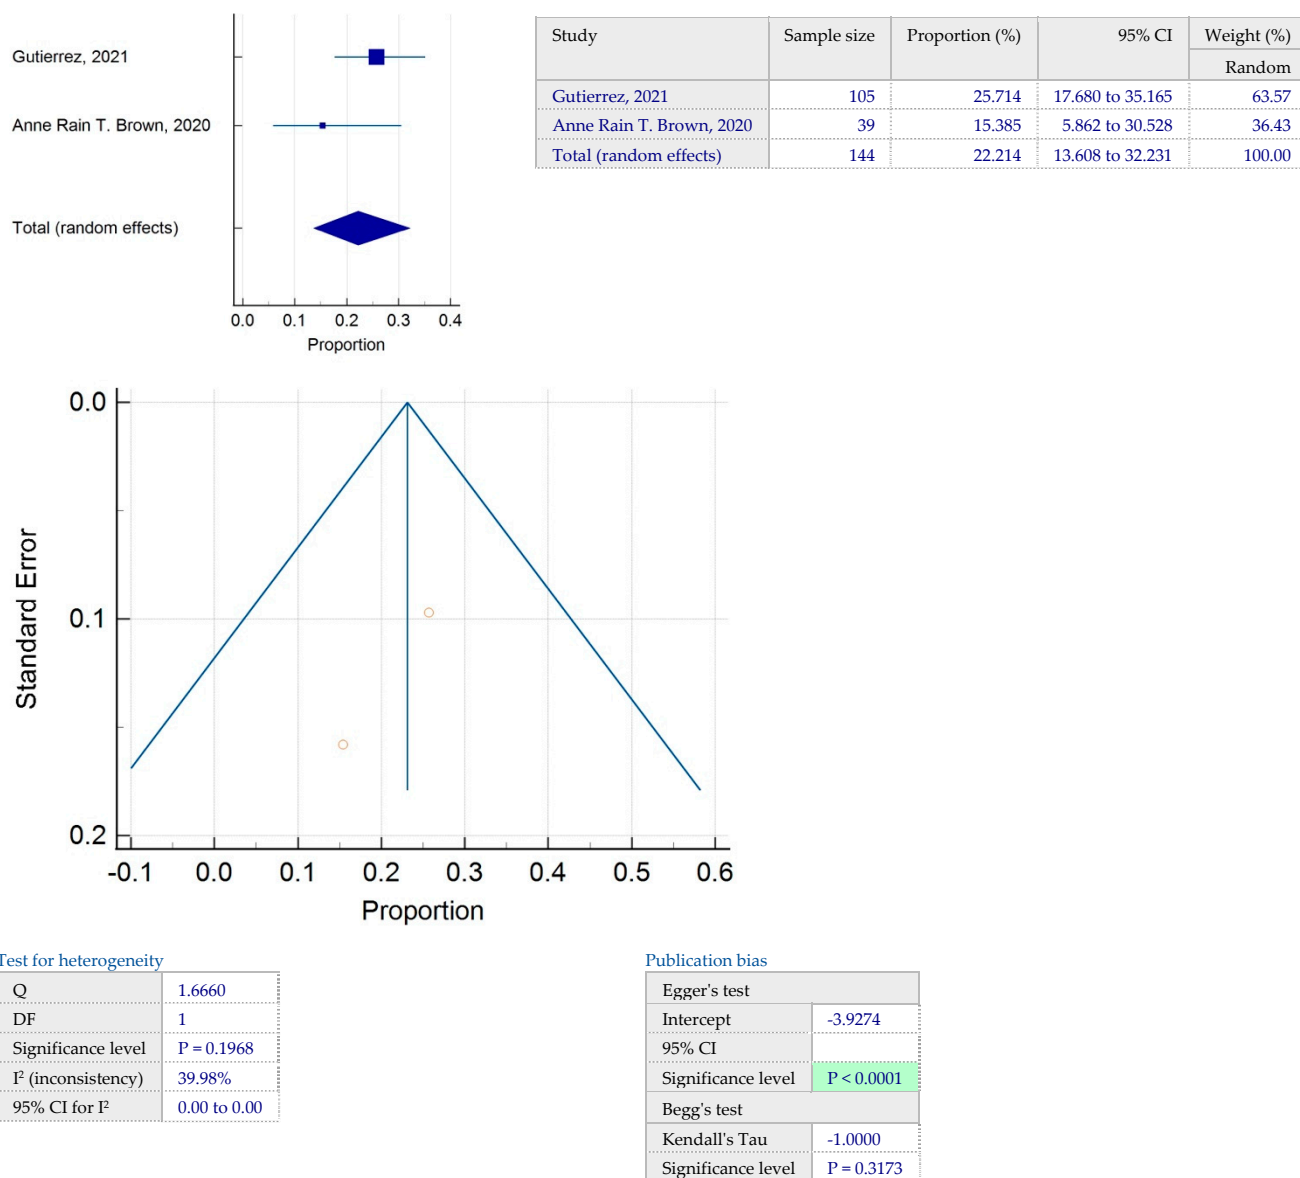

**Figure 15.** Forest plot of proportions of CAR-T recipients who were admitted to the ICU with arrhythmias as the main symptom of CRS, in published studies.

**Figure 15** shows the combined proportion for our outcome of interest – arrhythmias as the main symptom of CRS at admission to the ICU, as a percentage. On average, 22% CI-95% [14-32] of the CAR-T recipients were admitted to the ICU with arrhythmias as the main symptom of CRS. A moderate level of heterogeneity was reported (40%) with a  $p > 0.10$ .

## 16.CRS presentation – acute kidney injury

| Study | Sample size | Proportion (%) | 95% CI | Weight (%) |
|-------|-------------|----------------|--------|------------|
|-------|-------------|----------------|--------|------------|

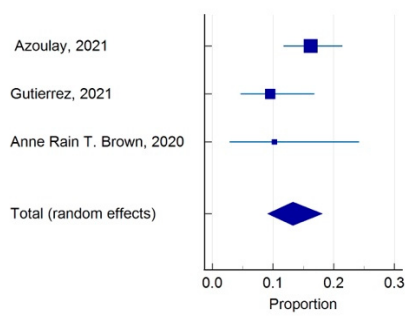

|                          |     |        |                  | Random |
|--------------------------|-----|--------|------------------|--------|
| Azoulay, 2021            | 241 | 16.183 | 11.768 to 21.451 | 51.76  |
| Gutierrez, 2021          | 105 | 9.524  | 4.662 to 16.818  | 32.61  |
| Anne Rain T. Brown, 2020 | 39  | 10.256 | 2.866 to 24.221  | 15.63  |
| Total (random effects)   | 385 | 13.282 | 9.078 to 18.144  | 100.00 |

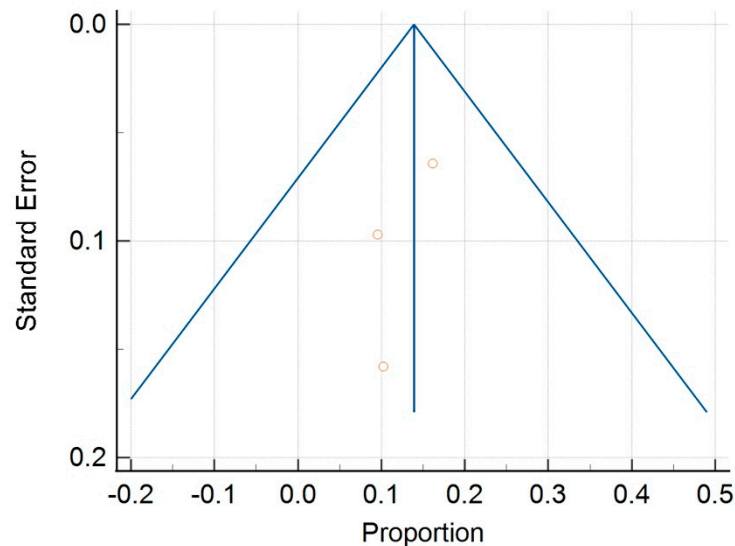

#### Test for heterogeneity

|                                |               |
|--------------------------------|---------------|
| Q                              | 2.9984        |
| DF                             | 2             |
| Significance level             | P = 0.2233    |
| I <sup>2</sup> (inconsistency) | 33.30%        |
| 95% CI for I <sup>2</sup>      | 0.00 to 97.76 |

#### Publication bias

|                    |                     |
|--------------------|---------------------|
| Egger's test       |                     |
| Intercept          | -2.2177             |
| 95% CI             | -28.0187 to 23.5833 |
| Significance level | P = 0.4720          |
| Begg's test        |                     |
| Kendall's Tau      | -0.3333             |
| Significance level | P = 0.6015          |

**Figure 16.** Forest plot of proportions of CAR-T recipients who were admitted to the ICU with AKI as the main symptom of CRS, in published studies.

**Figure 16** shows the combined proportion for our outcome of interest – AKI as the main symptom of CRS at admission to the ICU, as a percentage. On average, 13% CI-95% [9-18] of the CAR-T recipients were admitted to the ICU with AKI as the main symptom of CRS. A low level of heterogeneity was reported (33%) with a  $p > 0.10$ .

## 17. CRS developed during ICU stay

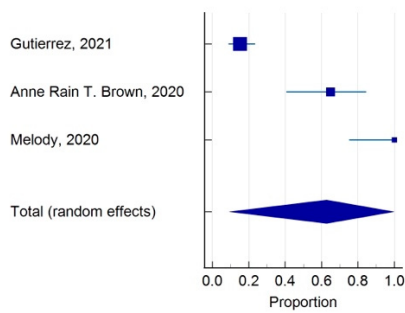

| Study                    | Sample size | Proportion (%) | 95% CI            | Weight (%) |
|--------------------------|-------------|----------------|-------------------|------------|
| Gutierrez, 2021          | 105         | 15.238         | 8.968 to 23.563   | 34.32      |
| Anne Rain T. Brown, 2020 | 20          | 65.000         | 40.781 to 84.609  | 33.18      |
| Melody, 2020             | 13          | 100.000        | 75.295 to 100.000 | 32.50      |
| Total (random effects)   | 138         | 62.760         | 9.366 to 99.720   | 100.00     |

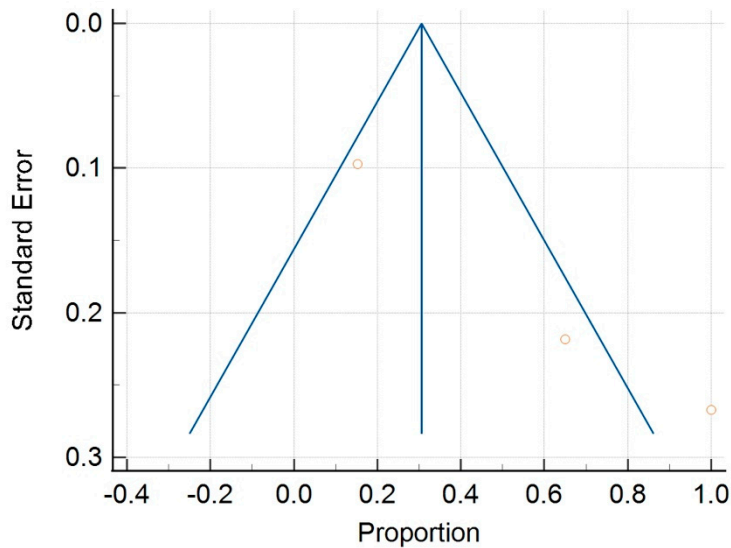

#### Test for heterogeneity

|                                |                |
|--------------------------------|----------------|
| Q                              | 64.1914        |
| DF                             | 2              |
| Significance level             | P < 0.0001     |
| I <sup>2</sup> (inconsistency) | 96.88%         |
| 95% CI for I <sup>2</sup>      | 93.67 to 98.47 |

#### Publication bias

|                    |                     |
|--------------------|---------------------|
| Egger's test       |                     |
| Intercept          | 10.7162             |
| 95% CI             | -14.0078 to 35.4402 |
| Significance level | P = 0.1144          |
| Begg's test        |                     |
| Kendall's Tau      | 1.0000              |
| Significance level | P = 0.1172          |

**Figure 17.** Forest plot of proportions of CAR-T recipients who developed CRS during ICU stay, in published studies.

**Figure 17** shows the combined proportion for our outcome of interest – patients who developed CRS during ICU stay, as a percentage. On average, 62% CI-95% [9,3-99] of the CAR-T recipients developed CRS during ICU stay. A considerable level of heterogeneity was reported (97%).

## 18.ICANS developed during ICU stay

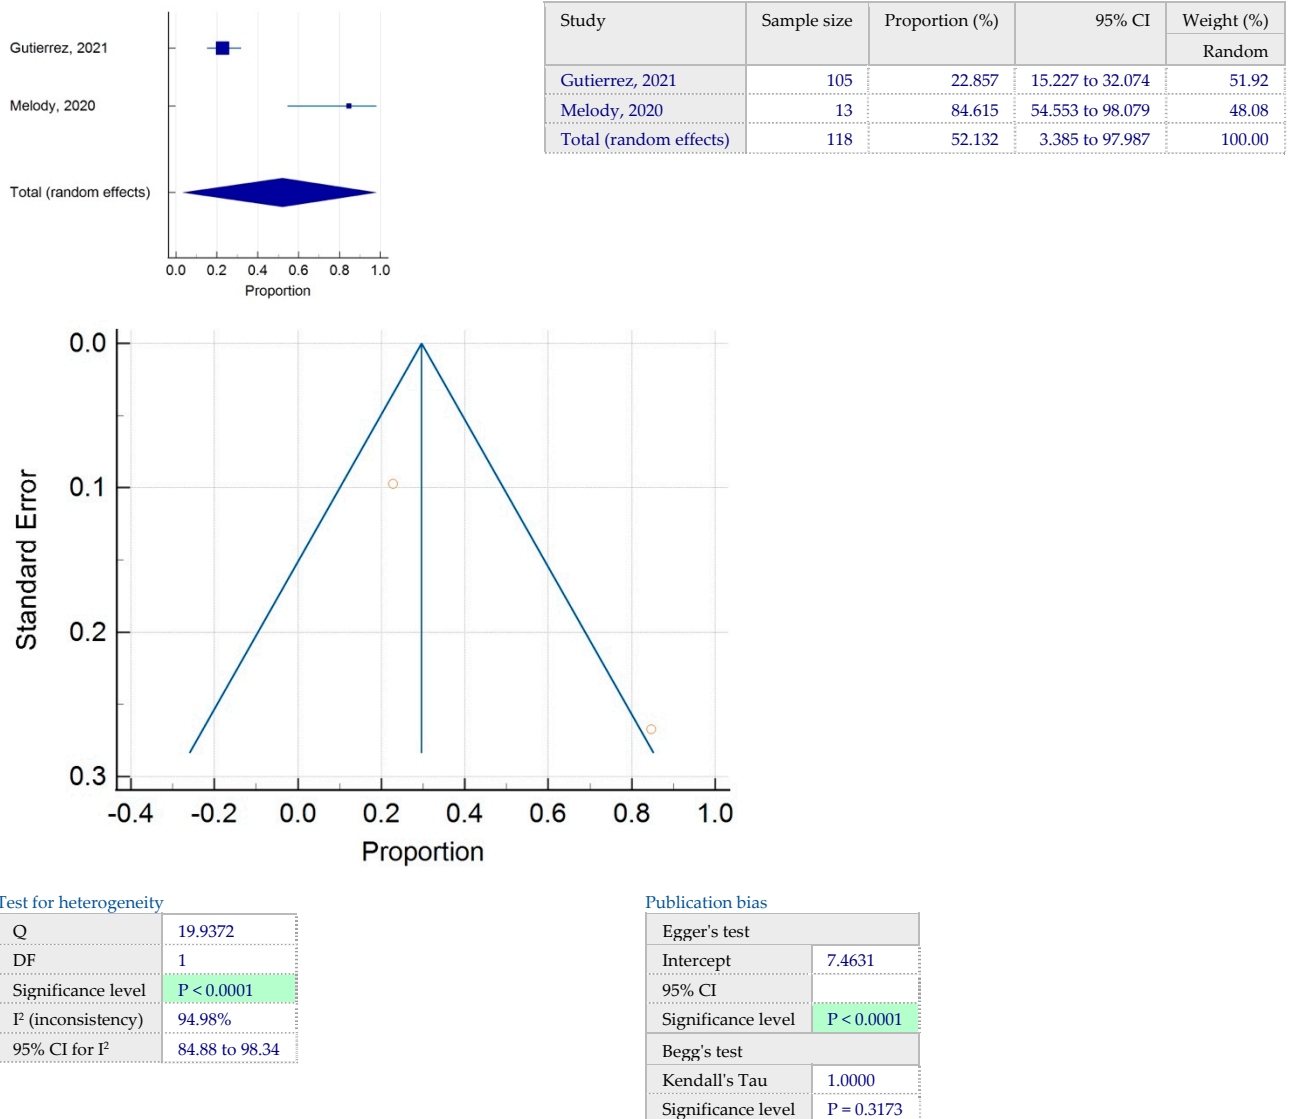

**Figure 18.** Forest plot of proportions of CAR-T recipients who developed ICANS during ICU stay, in published studies.

**Figure 18** shows the combined proportion for our outcome of interest – patients who developed ICANS during ICU stay, as a percentage. On average, 52% CI-95% [3,3-98] of the CAR-T recipients developed ICANS during their ICU stay. A considerable level of heterogeneity was reported (95%).

## 19. High-flow nasal oxygen, non-invasive ventilation required

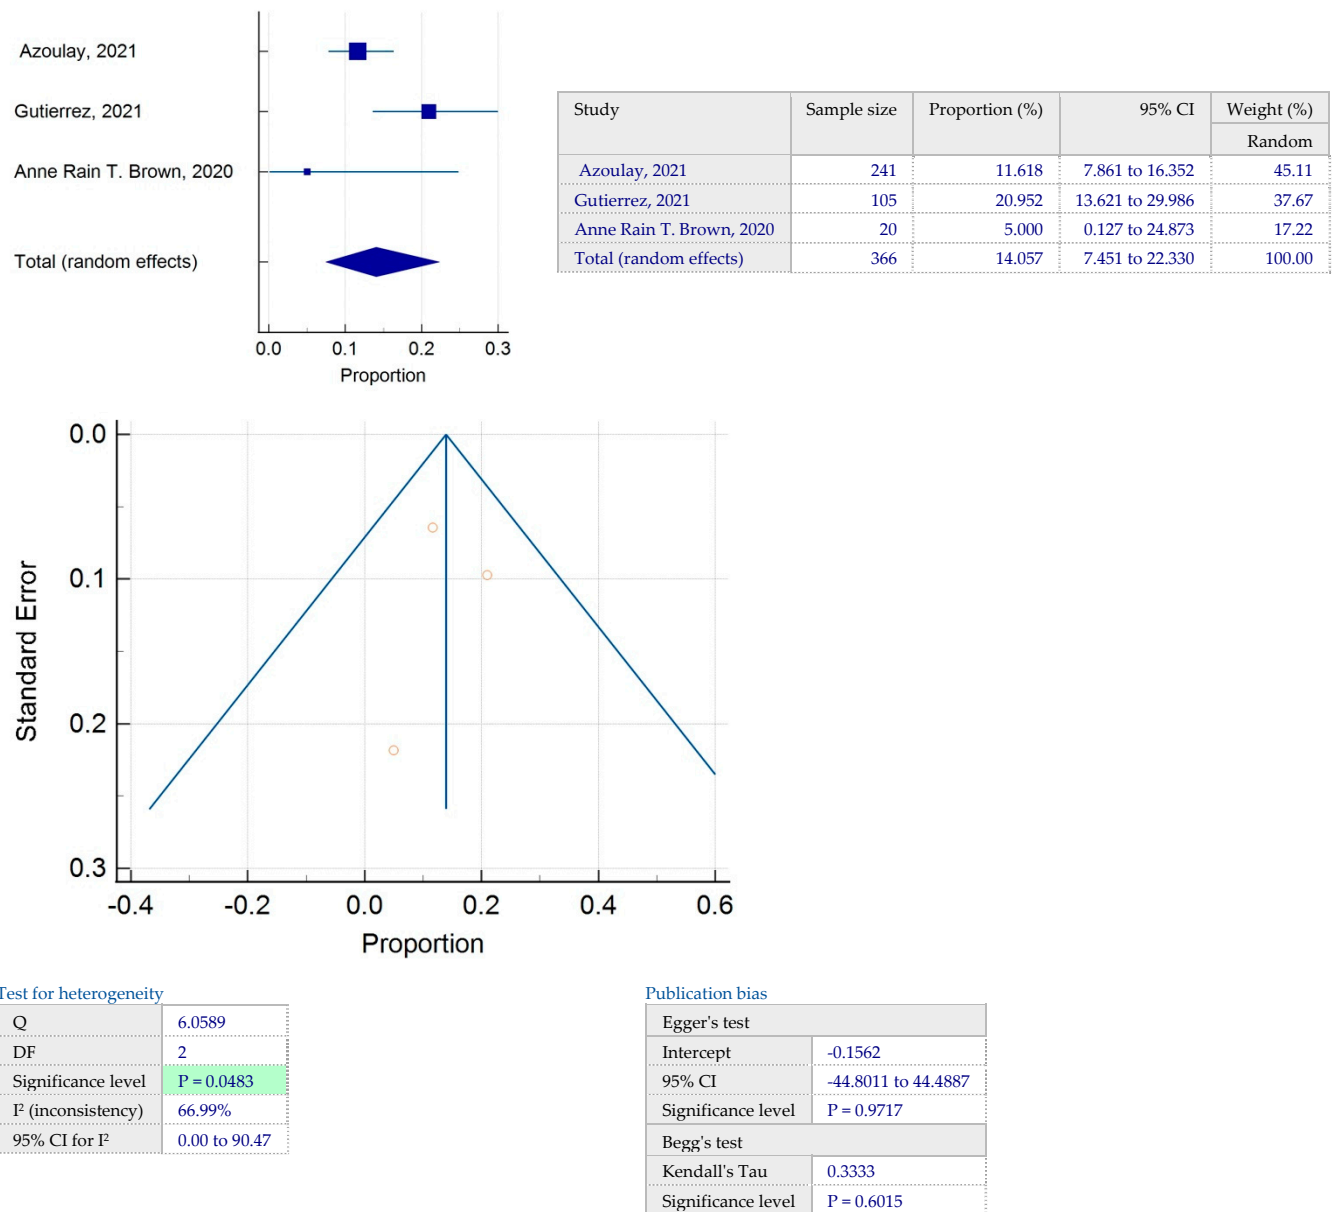

**Figure 19.** Forest plot of proportions of CAR-T recipients who required high-flow nasal oxygen or noninvasive ventilation during their ICU stay, in published studies.

**Figure 19** shows the combined proportion for our outcome of interest – patients who required high-flow nasal oxygen or noninvasive ventilation during their ICU stay, as a percentage. On average, 14% CI-95% [7,5-22] of the CAR-T recipients required high-flow nasal oxygen or noninvasive ventilation during their ICU stay. A substantial level of heterogeneity was reported (67%).

## 20. Vasoactive drugs

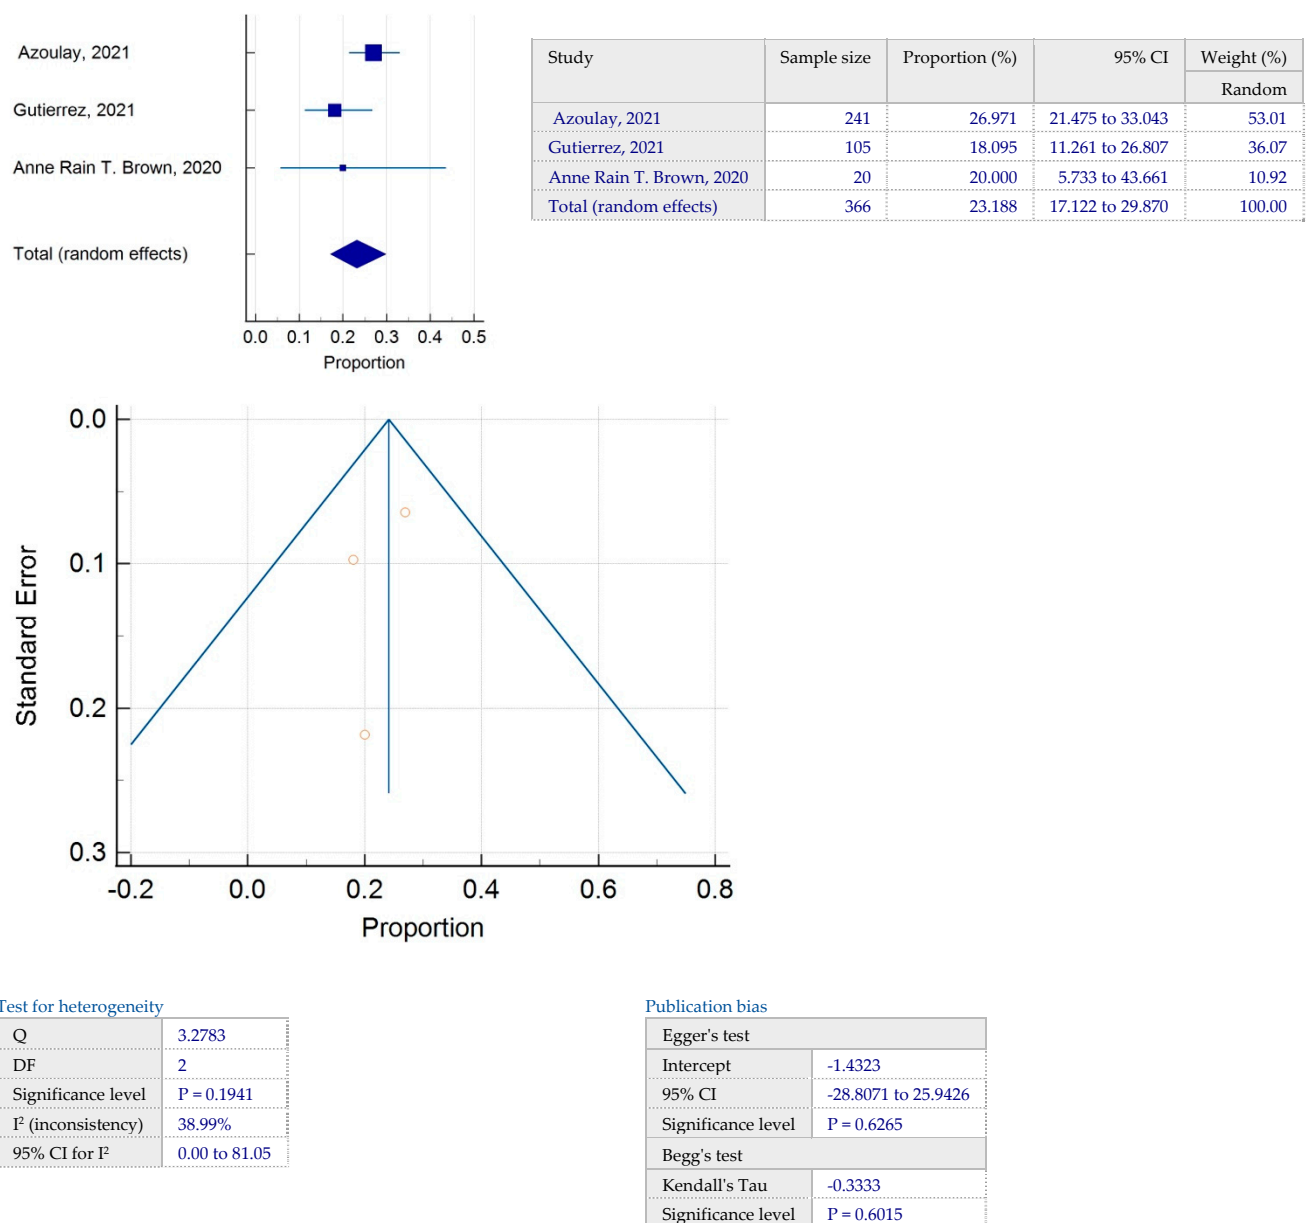

**Figure 20.** Forest plot of proportions of CAR-T recipients who required vasoactive drugs during ICU stay, in published studies.

**Figure 20** shows the combined proportion for our outcome of interest – patients who required vasoactive drugs during ICU stay, as a percentage. On average, 23% CI-95% [17-29] of the CAR-T recipients required vasoactive drugs during their ICU stay. A moderate level of heterogeneity was reported (39%) with a  $p > 0.10$ .

## 21. Renal replacement therapy

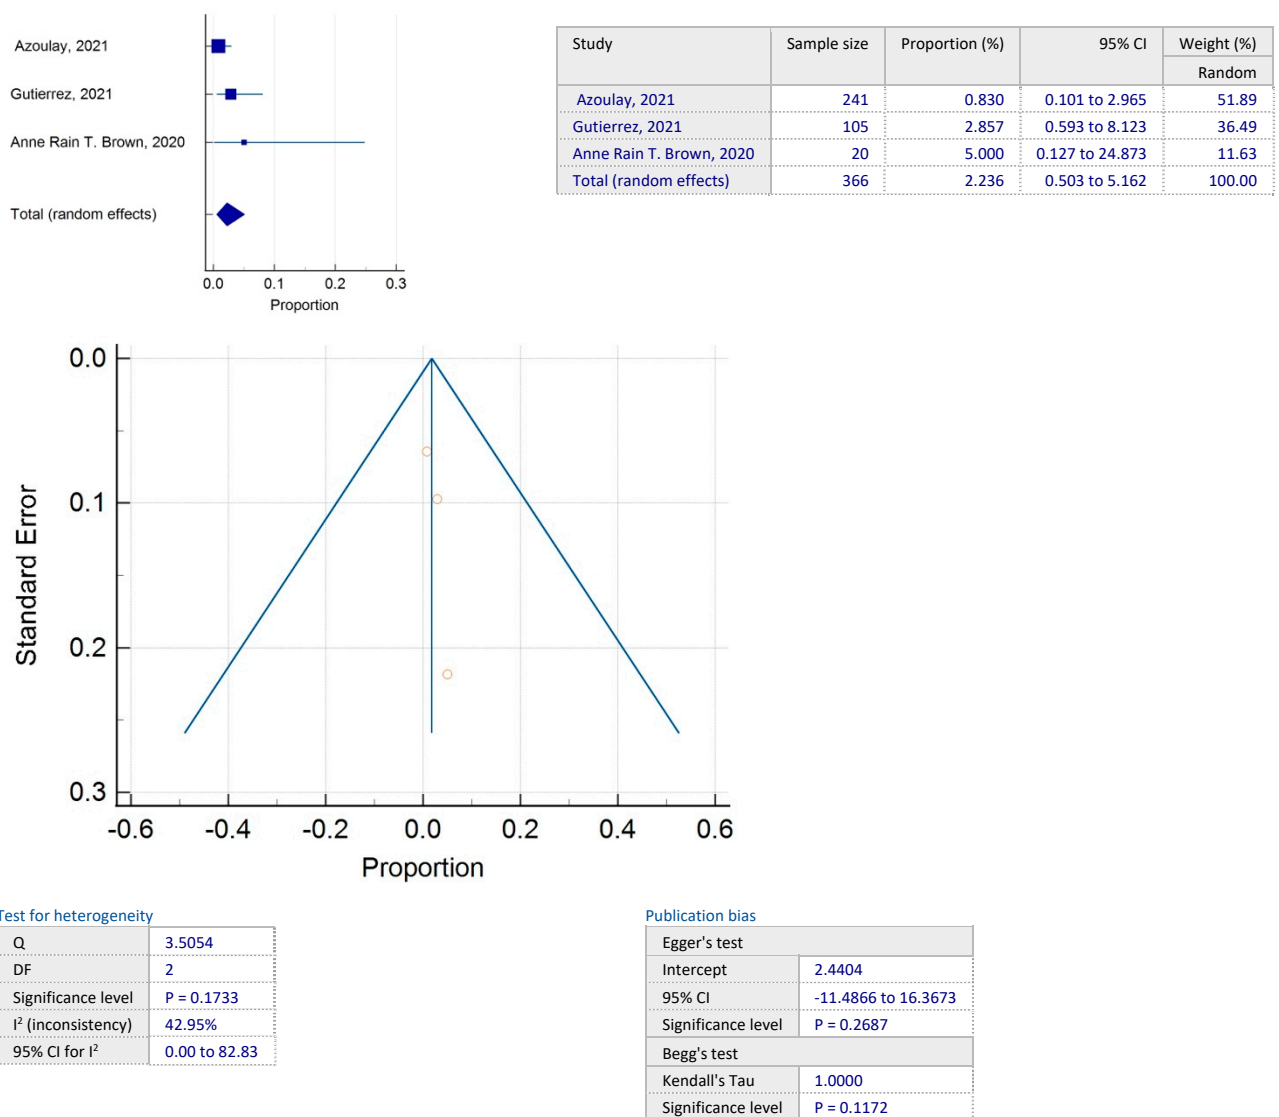

**Figure 21.** Forest plot of proportions of CAR-T recipients who required renal replacement therapy (RRT) during ICU stay, in published studies.

**Figure 21** shows the combined proportion for our outcome of interest – patients who required RRT during ICU stay, as a percentage. On average, 2% CI-95% [0.5-5] of the CAR-T recipients required RRT during ICU stay. A moderate level of heterogeneity was reported (43%) with a  $p > 0.10$ .

## 22. Mechanical ventilation during ICU stay

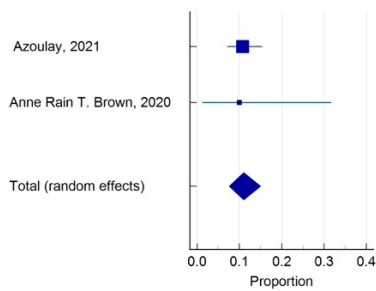

| Study                    | Sample size | Proportion (%) | 95% CI          | Weight (%) |
|--------------------------|-------------|----------------|-----------------|------------|
| Azoulay, 2021            | 241         | 10.788         | 7.169 to 15.407 | 92.02      |
| Anne Rain T. Brown, 2020 | 20          | 10.000         | 1.235 to 31.698 | 7.98       |
| Total (random effects)   | 261         | 11.016         | 7.526 to 15.076 | 100.00     |

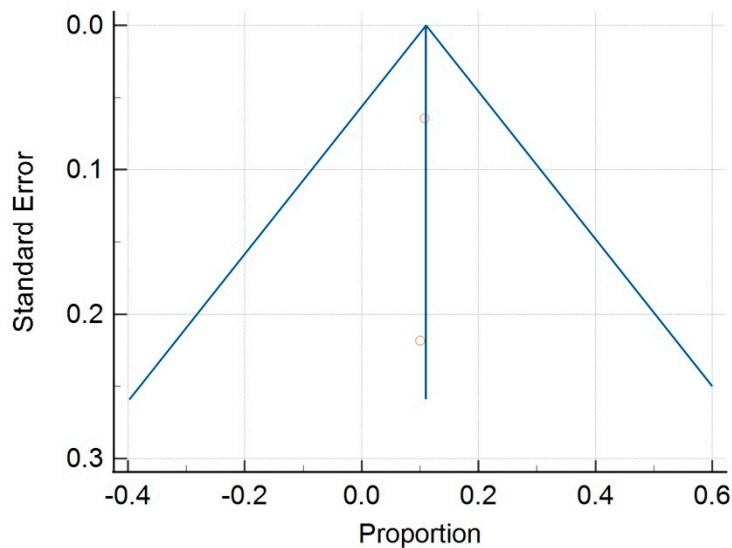

Test for heterogeneity

|                                |              |
|--------------------------------|--------------|
| Q                              | 0.01389      |
| DF                             | 1            |
| Significance level             | P = 0.9062   |
| I <sup>2</sup> (inconsistency) | 0.00%        |
| 95% CI for I <sup>2</sup>      | 0.00 to 0.00 |

Publication bias

|                    |            |
|--------------------|------------|
| Egger's test       |            |
| Intercept          | 0.1741     |
| 95% CI             |            |
| Significance level | P < 0.0001 |
| Begg's test        |            |
| Kendall's Tau      | 1.0000     |
| Significance level | P = 0.3173 |

**Figure 22.** Forest plot of proportions of CAR-T recipients who required invasive mechanical ventilation during ICU stay, in published studies.

**Figure 22** shows the combined proportion for our outcome of interest – patients who required invasive mechanical ventilation during ICU stay, as a percentage. On average, 11% CI-95%[7,5-15] of the CAR-T recipients required invasive mechanical ventilation during ICU stay. A 0% level of heterogeneity was reported with a  $p > 0.10$ .



## 23. Readmission to the ICU within 30 days

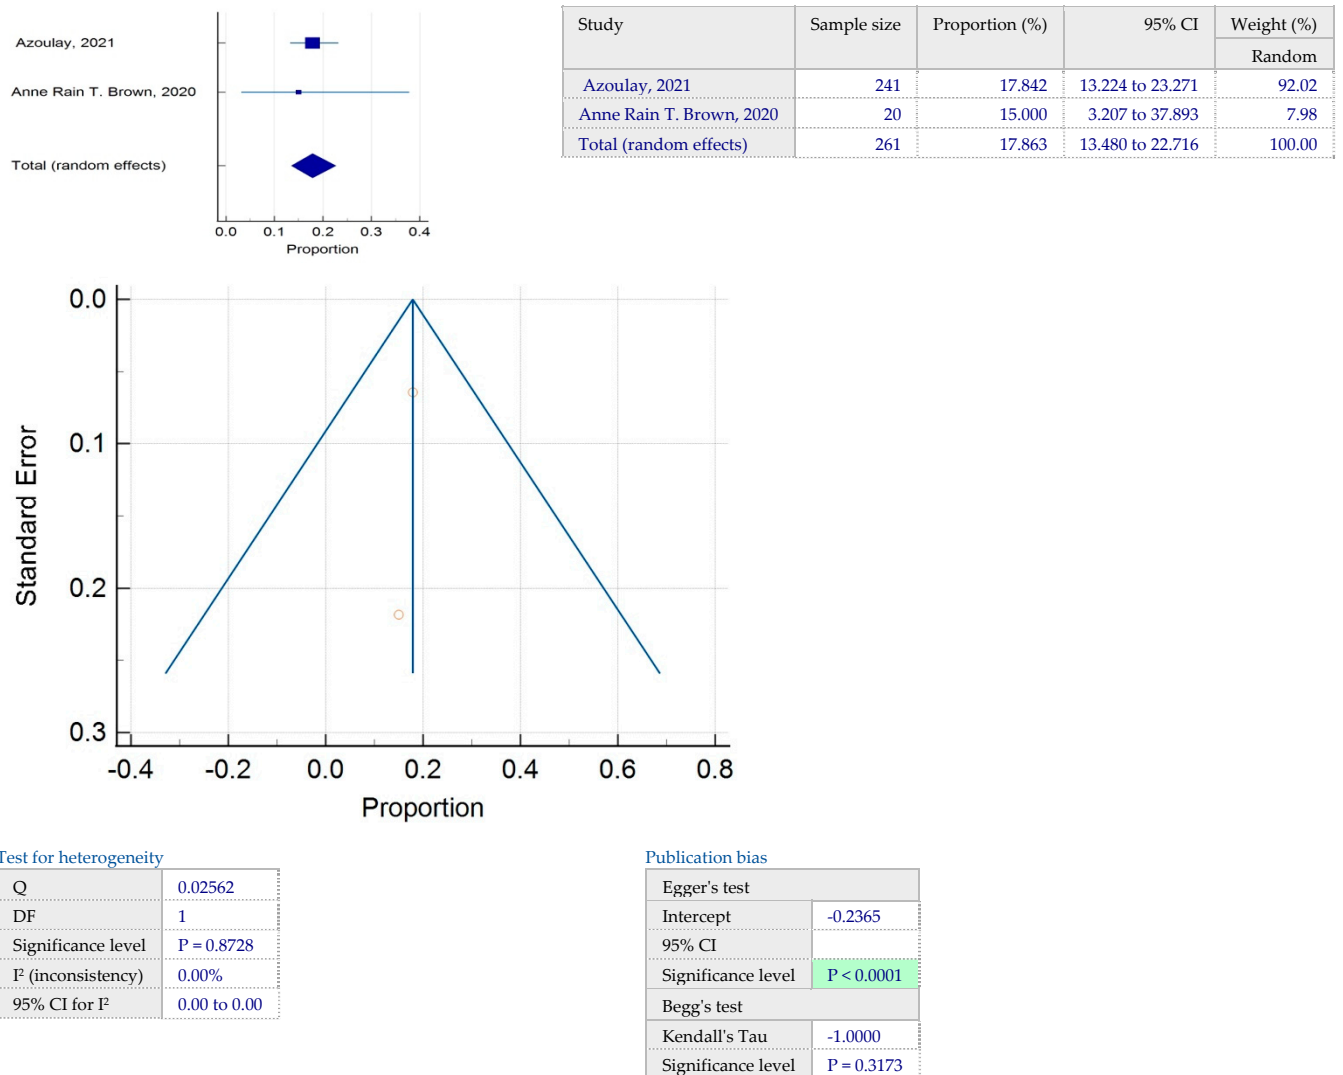

**Figure 23.** Forest plot of proportions of CAR-T recipients who were readmitted to the ICU within 30 days, in published studies.

**Figure 23** shows the combined proportion for our outcome of interest – patients who were readmitted to the ICU within 30 days, as a percentage. On average, 18% CI-95% [13,5-23] of the CAR-T recipients were readmitted to the ICU within 30 days. A 0% level of heterogeneity was reported with a  $p > 0.10$ .

## 24.Malignancy

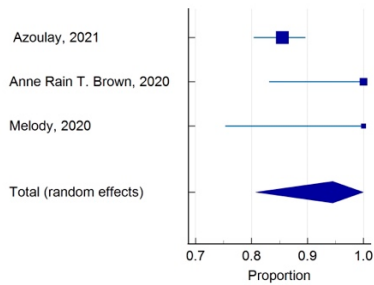

| Study                    | Sample size | Proportion (%) | 95% CI            | Weight (%) |
|--------------------------|-------------|----------------|-------------------|------------|
| Azoulay, 2021            | 241         | 85.477         | 80.385 to 89.671  | 42.31      |
| Anne Rain T. Brown, 2020 | 20          | 100.000        | 83.157 to 100.000 | 30.84      |
| Melody, 2020             | 13          | 100.000        | 75.295 to 100.000 | 26.85      |
| Total (random effects)   | 274         | 94.508         | 80.730 to 99.965  | 100.00     |

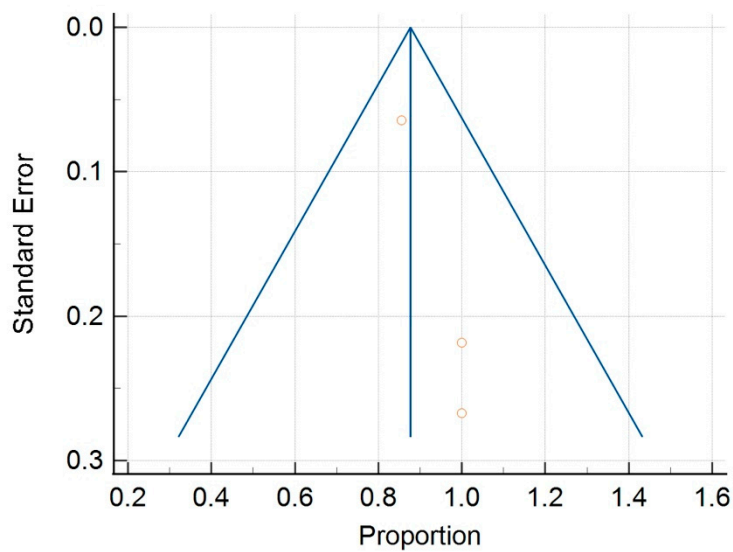

### Test for heterogeneity

|                                |                |
|--------------------------------|----------------|
| Q                              | 9.1328         |
| DF                             | 2              |
| Significance level             | P = 0.0104     |
| I <sup>2</sup> (inconsistency) | 78.10%         |
| 95% CI for I <sup>2</sup>      | 29.36 to 93.21 |

### Publication bias

|                    |                    |
|--------------------|--------------------|
| Egger's test       |                    |
| Intercept          | 3.0556             |
| 95% CI             | -4.6350 to 10.7462 |
| Significance level | P = 0.1245         |
| Begg's test        |                    |
| Kendall's Tau      | 0.3333             |
| Significance level | P = 0.6015         |

**Figure 24.** Forest plot of proportions of patients who had the diagnosis of lymphoma or follicular lymphoma for which they received CAR-T therapy, in published studies.

**Figure 24** shows the combined proportion for our outcome of interest – patients who had a diagnosis of lymphoma or follicular lymphoma for which they received CAR-T therapy, as a percentage. On average, 95% CI-95%[80-99] of the CAR-T recipients had a diagnosis of lymphoma or follicular lymphoma. A considerable level of heterogeneity was reported (78%).
